## RESEARCH ARTICLE

# Energy contribution of *NOVA* food groups and the nutritional profile of the Brazilian rural workers' diets

Monica Cattafesta<sup>1</sup>, Glenda Blaser Petarli<sup>1</sup>, Eliana Zandonade<sup>1‡</sup>, Olívia Maria de Paula Alves Bezerra<sup>2‡</sup>, Sandra Marlene Ribeiro de Abreu<sup>3</sup>, Luciane Bresciani Salaroli<sup>1‡\*</sup>

**1** Graduate Program in Collective Health, Federal University of Espírito Santo, Vitória, ES, Brazil, **2** Department of Family Medicine, Mental and Collective Health, Federal University of Ouro Preto, Ouro Preto, MG, Brazil, **3** Faculty of Sports, Research Center on Physical Activity, Health and Leisure, University of Porto, Porto, Portugal

☞ These authors contributed equally to this work.

‡ EZ, OMPAB and LBS also contributed equally to this work.

\* [lucianebresciani@gmail.com](mailto:lucianebresciani@gmail.com)

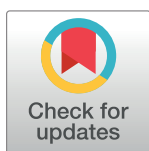

## OPEN ACCESS

**Citation:** Cattafesta M, Petarli GB, Zandonade E, Bezerra OMdPA, Abreu SMRd, Salaroli LB (2020) Energy contribution of *NOVA* food groups and the nutritional profile of the Brazilian rural workers' diets. PLoS ONE 15(10): e0240756. <https://doi.org/10.1371/journal.pone.0240756>

**Editor:** Samson Gebremedhin, Addis Ababa University, ETHIOPIA

**Received:** June 15, 2020

**Accepted:** October 2, 2020

**Published:** October 28, 2020

**Copyright:** © 2020 Cattafesta et al. This is an open access article distributed under the terms of the [Creative Commons Attribution License](https://creativecommons.org/licenses/by/4.0/), which permits unrestricted use, distribution, and reproduction in any medium, provided the original author and source are credited.

**Data Availability Statement:** All relevant data are within the manuscript and its Supporting Information files.

**Funding:** This research was funded by Research and Innovation Support Foundation of Espírito Santo (FAPES), URL: <https://fapes.es.gov.br/> with grant number FAPES/CNPq/Decit - SCTIE-MS/ SESA n° 05/2015 – PPSUS (Research Program for Brazilian Health Unic System) received by LBS. The funders had no role in study design, data collection

## Abstract

We estimated the caloric contribution of minimally processed foods, processed culinary ingredients, processed foods and ultra-processed foods in Brazilian farmers' diets and their association with the nutritional profile of the diet. It is an epidemiological study of cross-sectional, analytical and quantitative design with 740 farmers adults of Southeastern Brazil. Food intake data were obtained by applying three 24-hour recalls and were classified according to the degree and purpose of processing. The largest caloric contribution came from the group of minimally processed foods (64.7%), followed by ultra-processed foods (17.7%), processed culinary ingredients (12.4%), and processed foods (5.2%). Individuals in the fourth quartile of caloric contribution from minimally processed foods showed lower energy consumption ( $\beta$  -0.16,  $P < 0.001$ ) and greater consumption of all 15 micronutrients analyzed. In contrast to what was identified for this food group, the higher caloric contribution from ultra-processed foods was associated with a greater caloric content of the diet ( $\beta$  0.17,  $P < 0.001$ ) and lower consumption of all 23 analyzed nutrients. Therefore, the caloric contribution from the consumption of ultra-processed foods in the rural area is still lower than the national average. However, measures aimed at delaying isocaloric exchanges for the group of ultra-processed foods must be carried out, maintaining the local food culture, since this group had worse nutritional levels. In addition, incentives to the greater consumption of minimally processed foods should be carried out, due to their nutritional quality.

## Introduction

Agriculture is an integral part of our culture, as almost all of human history involves agrarian societies [1]. However, the way in which human beings produce and obtain food has undergone major changes over the years [2], changing the perception of food produced by farmers, which has come to be understood as a commodity, a form of subsistence and necessary work tool [1, 3, 4] for supply the agro-industrial market [1, 5].

and analysis, decision to publish, or preparation of the manuscript.

**Competing interests:** The authors have declared that no competing interests exist.

The change in the food consumption of the populations also accompanied these modification in the form of food production and distribution, multiplying the availability of food [6], with foods increasingly displaced from their geographic roots, standardizing and homogenizing in various parts of the globe, offering products increasingly closer to the stage of consumption [7].

In this context, as of 2010, with the publication of studies by Monteiro et al. [8], research in the field of food, nutrition and health was based on the new classification of foods (*NOVA*—a name, not an acronym), that takes into account the extent and purpose of processing, the basis of the Food Guide for the Brazilian Population [9]. This methodology classifies foods and food products into four clearly distinct groups: *in natura* and minimally processed foods; processed culinary ingredients; processed foods; and ultra-processed foods [10].

This way of investigating eating habits is in line with the transition of food systems, since the consumption of ultra-processed foods has become dominant worldwide [10], with a high caloric contribution being demonstrated from these types of foods in developed countries such as United States of America (60.0%) [11], United Kingdom (54.3%) [12] and Canada (45.0%) [13]. But not unlike this profile, Brazil also showed a significant increase in the share of ready-to-eat products in its diet (from 23.0% to 27.8% of calories), due to the increase in the acquisition of ultra-processed products (from 20.8% to 25.4% between 2002–2003 and 2008–2009) and a significant reduction in the participation of minimally processed foods and culinary ingredients [14]. Moreover, 20.4% of the energy contribution of the Brazilian diet comes from ultra-processed foods [15].

Some studies have identified a lower nutritional quality of ultra-processed foods [15–29], however, it seems that the acquisition of this type of food is still less in rural areas [30] and there are no studies available, so far, on the evaluation of the nutritional profile of the farmers' diet related to the degree and purpose of food processing, even though it has already been identified that this is a group with high cardiovascular risk [31], multimorbidity [32] and also adherence to an industrialized dietary pattern [33]. Because of the “agrarian myth”, it is believed that the traditional agricultural population enjoys a fully healthy life, with excellent eating habits [34]. However, epidemiological studies demonstrate changes in rural eating habits, share many similarities with their urban peers [33, 35–39]. Although farmers have options to obtain food through their own plantations or community sharing, there are also food deserts in remote agricultural areas [40, 41], with high costs for healthy foods [42], difficult access due the long distances or lack of means of transport, and difficulty in adequate storage of fresh and healthy products [41, 43]. Furthermore, the low education of these workers can also influence their income and healthy food choices [41] or the lack of understanding of the food produced as food for self-consumption, recognizing them only as merchandise and source of income [3]. In addition, rural labor structures, in which the whole family is involved or the long distances required to farm, in some cases, can lead to a lack of time for preparation of healthy meals [41]. Thus, the objective of this study was to estimate the caloric contribution of minimally processed foods, processed culinary ingredients, processed foods and ultra-processed foods in Brazilian farmers' diets and their association with the nutritional profile of the diet.

## Materials and methods

### Study design

This is an epidemiological study of cross-sectional, analytical and quantitative design developed in the municipality of Santa Maria de Jetibá, located in the highlands of the state of Espírito Santo, Southeastern Brazil. This study integrates, in larger scope, the study “Health condition and associated factors: a study in farmers of Espírito Santo—AgroSaúdeS”.

The representative sample of male and female farmers exposed here met the following inclusion criteria: adults 18–59 years old, non-pregnant, who had agriculture as their main source of income and were in full employment for at least six months. Individuals who did not meet these criteria were excluded. To identify eligible farmers, we used data available in the records of individuals and families conducted by the Family Health Strategy teams, responsible for covering 100% of the eleven health regions of the municipality.

### Sampling

7,287 farmers were identified from a total of 4,018 families. About this population universe, we calculated a minimum sample of 708 farmers, considering a sampling error of 3.5%, 95% confidence interval and prevalence of 50% to maximize sample. In order to reach the minimum sample and considering possible losses, recruitment included 806 individuals.

To define the sample universe one list was built with the survey of the registration of individuals and families by the Community Health Agents, through the data available in the family register used by the Family Health Strategy teams. This register covers 100% of the eleven health regions of the municipality. The participants were selected by stratified draw, proportionality the number of families per health region, in order to respect proportionality among the eleven regions. In families with more than one eligible, only one individual was drawn, avoiding thus the interdependence of information. In cases of refusal of participation or non-attendance in data collection, a new participant in the waiting list of the lottery was called, respecting the sex and region of origin of the dropout.

### Data collection

Data collection took place between December 2016 and April 2017 in the facilities of the municipal health units of the Family Health Strategy teams. A semi-structured questionnaire containing questions about socioeconomic, occupational, lifestyle and food consumption characteristics was applied [44].

### Food consumption data collection

Food consumption data were obtained by applying three 24-hour recalls (R24h) during the interview, two days of the week and one day of the weekend within 15 days after the first R24h in the return interviews. In order to obtain greater accuracy of the portions consumed, photo albums were used to facilitate the identification and quantification of the consumed items. Data were collected from 790 farmers, but 27 individuals were excluded since they underwent only one R24h and 23 since they underwent only two (6.3% loss), resulting in a final sample of 740 farmers. As such, the total lied above the minimum sample of 708 farmers, therefore, being then representative of the total population.

The nutritional composition of the R24h was performed using the software AvaNutri 4.1 (Avanutri Equipamentos de Avaliação Ltda, Três Rios, RJ, Brazil) in which the Brazilian Table of Food Composition [45] was selected for extraction of nutritional information. Information from the manufacturer or from standard recipes was used for the registration of typical regional foods that were not available at a table and possible dietary supplements were registered. After the registration of the food and acquiring the calories, no exclusion was performed due to extremes in energy consumption [46].

After obtaining the values of each R24h, the analysis of the attenuation was performed using the PC-SIDE software (Department of Statistics, Iowa State University, Iowa, EUA), which follows the methodology of Nusser et al. [47]. Then, the adjustment for energy by the

residual method was carried out, which corrects the estimates of nutrients by total energy intake [46].

### Classification of food according to the degree and purpose of processing

The foods consumed by farmers in the three R24h were listed (n = 355 food items). These foods were classified according to NOVA, that is, in four groups: *in natura* and minimally processed foods; processed culinary ingredients; processed foods; and ultra-processed foods [8, 48]. This classification takes into account the extent and purpose of foods processing, being food processing classified as any physical, biological and chemical process that occurred after harvesting or separating food from nature and before it was subjected to culinary preparation in the kitchens of houses or restaurants, or before its consumption when are processed products fully ready for consumption [48]. The methods used by farmers and producers in growing plants and raising animals are not considered in such a classification [8].

*In natura* and minimally processed foods are edible parts of plants (seeds, fruits, leaves, stems, roots) or animals (muscles, viscera, eggs, milk) and also mushrooms and algae after their separation from nature that have undergone minimal processes, such as cleaning and conditioning. Processed culinary ingredients are substances extracted directly from group 1 foods or from nature and consumed as items of culinary preparations. Processed foods are products manufactured by adding salt or sugar and, eventually, oil, vinegar or another group 2 substance to a group 1 food (e. g. canned or bottled whole vegetables and legumes preserved in brine, whole fruits preserved in syrup, tinned fish preserved in oil, some types of processed meat and cheese). Most of these products contain two or three ingredients. Finally, ultra-processed foods are industrial formulations typically made with five or more ingredients. These ingredients often include substances and additives used in the manufacture of processed foods, unusual substances in culinary preparations, additives whose function is to simulate sensory attributes of group 1 foods or culinary preparations of these foods, or to hide undesirable sensory attributes in final product (e. g. breakfast cereals, cake mixes, instant soups and noodles, many types of packaged breads, fatty or salty snack products, sugared drinks, candies (confectionery), margarines, cts). Group 1 foods represent a reduced proportion or are not even present in the list of ingredients of ultra-processed products [8, 9, 48].

Each food item was classified according to how it was consumed, as reported by farmers. In the R24h interview, the items combined/prepared together "by hand", whenever possible, were disaggregated for classification. The products/meals purchased ready were classified directly to the item consumed and the recipes made "by hand" without the possibility of disaggregating the ingredients were categorised according to the main constituent ingredient (for example: homemade breads, subgroup of flours; vinaigrette salad and soups, vegetables subgroup) [49].

After the classification of food items in each NOVA group, the calories from each food group and subgroup were added. Then, the caloric contribution of each food group to daily energy consumption was calculated as follows: Caloric contribution of the food group assessed = Calories from food consumption in this assessed group x 100 ÷ total gross calorie. The use of this indicator of caloric contribution of each food group (given in % of contribution) is more recommended than the gross energy of each food group, since it minimizes the differences in the total energy consumed (due to the differences in energy requirements of individuals), assesses the quality of the diet and not the quantity consumed and also makes it possible to assess the extent to which there is an exchange of culinary preparations for ultra-processed foods [8, 19, 23].

### Nutritional profile of the diet according to nutrient consumption

The nutritional profile of the diet was evaluated using the following markers: energy consumption (kcal and kJ), energy density (kcal/g), percentage of calories from macronutrients

(carbohydrates, proteins, lipids, saturated fatty acids–SFA–and polyunsaturated fatty acids–PUFA), cholesterol, fiber, vitamin A, vitamin B1, vitamin B2, vitamin B3, vitamin B6, vitamin B9, vitamin C, vitamin E, calcium, iron, phosphorus, potassium, sodium, selenium, zinc and copper (expressed in g, mg or  $\mu\text{g}$  per 1000 kcal).

In addition, the consumption of nutrients by each subject was evaluated according age- and sex-specific current recommendations in “within the recommended”, when it was within the recommended range, and “inadequate intake”, when it was above the tolerable upper intake or below the intake’s recommendation (S1 Table). The energy density was calculated for the solid fraction of the diet, which corresponds to the sum of calories from solid foods divided by the quantity in grams of these foods and classified according to the World Cancer Research Fund & American Institute for Cancer Research [50]. The percentage of total energy intake of carbohydrate, protein, lipid and PUFA followed the World Health Organization (WHO) recommendations published in 2003 [51], as well as the consumption of cholesterol and fibers. The percentage of SFA followed the WHO indications published in 2018 [52], as well as the consumption of potassium and sodium. The consumption of vitamins and minerals followed the recommendations of the Dietary Reference Intakes (DRI) of the Food and Nutrition Board (FNB) [53], using the values of Estimated Average Requirement (EAR) until the Tolerable Upper Intake Level (UL).

### Statistical analysis

The normality of the variables was assessed by the Shapiro-Wilk test. To describe the study variables, the median and mean was used as a measure of central tendency, and the interquartile range and standard deviation as a dispersion measure for continuous variables. The variables of food consumption (NOVA) were investigated in their continuous values and also categorized in quartiles.

To analyze the association between a quantitative and a qualitative variable, due to the abnormality of the variables, the Mann-Whitney U test was used. When the qualitative variable had three or more categories, the Kruskal-Wallis test and the Mann-Whitney U test were performed two by two to identify the differences. Missing data were maintained due to low data loss, different number of individuals in each variable were reported in the table captions.

The linear regression model was used to analyze the nutritional profile of the diet according to the caloric contribution of the NOVA groups (first quartile *versus* fourth quartile). The variables that had statistical significance with the food groups of up to 20% (i.e.  $P < 0.02$ ) in the binary analyzes (presented in S2 Table) were used as adjustment variables in the multiple models, that could include sociodemographic, labor, and lifestyle variables.

Among the sociodemographic variables were evaluated sex, age group (“up to 29 years”, “30 to 39 years”, “40 to 49 years” and “50 years or more”), marital status (“single”, “married/living with a partner” and “divorced/separated/widowed”), race/color (“white” and “non-white”), schooling (“less than 4 years”, “4 to 8 years” and “more than 8 years”), land bond (“owner” and “non-owner”) and socioeconomic class (“A or B”, “C” and “D or E”), according to the Criteria of Economic Classification Brazil, used in national studies to estimate socioeconomic classes according to the purchasing power of individuals and families, projecting the average monthly gross family income [54]. Labor variables were investigated by questioning the current type of production (“conventional” and “non-conventional”), the type of worked crops categorized into “temporary only”, “permanent only” and “temporary and permanent”, according to criteria of the Brazilian Institute of Geography and Statistics [55] and the workload (hours/week) (“less than or equal to 40 hours” and “more than 40 hours”). Lifestyle variables included alcohol consumption, categorized as “non-drinking” and “drinking”; smoking, assessed according

to the Smoker Approach and Treatment Consensus and categorized as “non-smoker” and “current and past smoker”; practice of physical activity extra-field (“yes” or “no”); and screen time obtained by the sum of daily activities for television, video game and computer/cell phone, divided by the days of the week, classified as “no sedentary leisure” when  $< 2$  hours/day and “with sedentary leisure” when  $\geq 2$  hours/day [56].

We used the Enter variable selection method. We also tested the assumptions of absence of multicollinearity (tolerance  $> 0.1$  and variance inflation factor  $< 10$ ), minimum sample size for the number of model variables ( $> 20$  individuals per model variable and  $> 5$  cases in each category of variables), absence of outliers (absence of standardized residues  $> \pm 3$  standard deviations; up to 1% of standardized residues between  $\pm 2.5$  and 3 standard deviations; and up to 5% of standardized residues between  $\pm 2.0$  and 2.5 standard deviations, Cook's distance  $< 1$ , and  $DF\beta < 1$ ), residues normally distributed (Durbin-Watson 1.5 to 2.5) and presence of homoscedasticity.

For all analyses, the level of significance adopted was  $\alpha < 5\%$  and these were performed using the statistical software IBM SPSS Statistics for Windows version 22.0 (IBM Corp, Armonk, NY, EUA).

### Ethical standards disclosure

This study was conducted according to the guidelines laid down in the Declaration of Helsinki and all procedures involving research study participants were approved by the Research Ethics Committee of the Health Sciences Center of the Federal University of Espírito Santo (Ufes) under number 1,856,331 (CAAE 52839116.3.0000.5060). Written informed consent was obtained from all subjects.

### Results

Of the 740 farmers evaluated, 51.5% ( $n = 381$ ) was men and 48.5% ( $n = 359$ ) was women. Most of the evaluated farmers were married or living with a partner, were in poor socioeconomic class and had low schooling (67.7% with less than 4 years of schooling) (Table 1).

The average caloric consumption of farmers was  $2,561.0 \pm 883.1$  kcal (Table 2), whom the group of minimally processed foods was the one that presented the greatest caloric contribution of this diet (64.7%), followed by ultra-processed foods (17.7%), processed culinary ingredients (12.4%), and processed foods (5.2%). The food items that contributed most energetically to the composition of the minimally processed food group were flours, meats, rice, and beans. The largest contributors to the processed foods group were breads, cookies, cakes and pastries. In the ultra-processed food group, consumption of pasta, bread, biscuits, cereals and industrialized sweets and sugary drinks stood out.

The differences between the sexes were tested (Table 2), in order to verify if the individuals had differences in the NOVA group consumption that justified the stratification of the subsequent analyzes by sex. However, the caloric contribution according to the NOVA groups did not differ between sexes. About the food groups, we found that consumption tends to be higher in males, with the exception of some foods such as fruits, milk, vegetables and green condiment, vegetable fat, breads, cookies, cereals and candies, which was higher in females.

When assessing the adequacy of nutrient intake (Table 3), a high percentage of inadequate intake was identified for some dietary parameters such as calcium (100.0%), potassium (99.6%), fibers (98.2%), energy density (98.1%), vitamin B9 (91.8%), sodium (83.0%), vitamin C (74.2%), carbohydrate (67.6%), vitamin A (67.2%), protein (63.6%) and zinc (50.1%). However, a high percentage of consumption within the recommendation was identified for vitamin B1 (99.7%), cholesterol (99.6%), phosphorus (99.3%), iron (99.2%), copper (98.9%), vitamin



**Table 1. General characteristics of study population.**

| Variables                     | n   | %    |
|-------------------------------|-----|------|
| <b>Sex</b>                    |     |      |
| Male                          | 381 | 51.5 |
| Female                        | 359 | 48.5 |
| <b>Age group</b>              |     |      |
| Up to 29 years                | 201 | 27.2 |
| 30 to 39 years                | 218 | 29.5 |
| 40 to 49 years                | 183 | 24.7 |
| 50 years or more              | 138 | 18.6 |
| <b>Marital status</b>         |     |      |
| Single                        | 56  | 7.6  |
| Married/living with a partner | 638 | 86.2 |
| Divorced/separated/widowed    | 46  | 6.2  |
| <b>Race/color</b>             |     |      |
| White                         | 669 | 90.4 |
| Non-white                     | 71  | 9.6  |
| <b>Socioeconomic class</b>    |     |      |
| A or B                        | 56  | 7.6  |
| C                             | 376 | 50.8 |
| D or E                        | 308 | 41.6 |
| <b>Schooling</b>              |     |      |
| Less than 4 years             | 501 | 67.7 |
| 4 to 8 years                  | 161 | 21.8 |
| More than 8 years             | 78  | 10.5 |

n = 740.

<https://doi.org/10.1371/journal.pone.0240756.t001>

B3 (98.0%), selenium (97.7%), vitamin E (97.0%), SFA (77.3%), vitamin B6 (59.6%), vitamin B2 (58.5%) and PUFA (55.4%).

When evaluating the proportion of individuals with adequate nutrient intake and the caloric contribution of each *NOVA* group, it can be observed that the farmers who have reached the recommendations of fibers, vitamins A and B6, phosphorus, and potassium were associated with higher energy consumption by minimally processed foods. In the group of processed culinary ingredients, higher consumption was associated with the proportion of individuals that presented adequacy of energy density, carbohydrates and vitamins C and E, and inadequacy of lipids and vitamin B6. Furthermore, the subjects who had inadequate consumption of energy density, carbohydrate, vitamin C, and phosphorus had a higher average caloric contribution from processed foods. Likewise, a higher contribution from ultra-processed foods was associated with inadequate consumption of energy density, carbohydrate, fiber, vitamins A and B6, iron, phosphorus, and potassium (Table 3).

The higher caloric contribution from minimally processed foods was associated with the lower caloric content of the diet ( $P = 0.003$ ) and the greater macro and micronutrient content (protein, lipids, fiber, vitamins A and E, B vitamins, calcium, iron, phosphorus, potassium, sodium, selenium, zinc, and copper). After adjustments, farmers in the fourth consumption quartile of this food group showed lower energy consumption ( $\beta -0.16$ ;  $P < 0.001$ ) and higher consumption of protein, lipid, SFA, cholesterol, and fiber. Likewise, the subjects with the highest consumption of minimally processed foods had the greater consumption of all 15 micronutrients analyzed (Table 4).

Table 2. Total calories and caloric contribution of NOVA groups and subgroups to the food consumption of Brazilian farmers.

| NOVA's groups and subgroups                                             | Total calories from consumption by NOVA groups and subgroups |              | Caloric contribution of NOVA groups and subgroups in daily energy consumption |             |                   |             |                     |             |              | p-value* |
|-------------------------------------------------------------------------|--------------------------------------------------------------|--------------|-------------------------------------------------------------------------------|-------------|-------------------|-------------|---------------------|-------------|--------------|----------|
|                                                                         |                                                              |              | Total                                                                         |             | Sex               |             |                     |             |              |          |
|                                                                         |                                                              |              |                                                                               |             | Male<br>(n = 381) |             | Female<br>(n = 359) |             |              |          |
|                                                                         |                                                              |              | Mean                                                                          | SD          | Mean              | SD          | Mean                | SD          | Mean         |          |
|                                                                         | (kcal)                                                       |              | (%)                                                                           |             | (%)               |             | (%)                 |             | (%)          |          |
| <b>Minimally processed</b>                                              | <b>1670.9</b>                                                | <b>716.2</b> | <b>64.7</b>                                                                   | <b>13.1</b> | <b>65.3</b>       | <b>12.8</b> | <b>64.2</b>         | <b>13.4</b> | 0.327        |          |
| Flours (corn, wheat and cassava)                                        | 597.4                                                        | 519.0        | 22.1                                                                          | 14.4        | 21.6              | 14.8        | 22.6                | 14.0        | 0.229        |          |
| Red meat                                                                | 257.4                                                        | 295.2        | 9.7                                                                           | 9.5         | 11.2              | 10.2        | 8.1                 | 8.4         | <0.001       |          |
| Poultry meat                                                            | 212.6                                                        | 203.9        | 8.5                                                                           | 7.0         | 8.5               | 6.9         | 8.6                 | 7.1         | 0.849        |          |
| Rice                                                                    | 169.2                                                        | 97.4         | 6.9                                                                           | 3.9         | 7.1               | 3.8         | 6.7                 | 3.9         | <b>0.047</b> |          |
| Beans                                                                   | 150.7                                                        | 108.5        | 6.0                                                                           | 3.9         | 6.5               | 4.2         | 5.4                 | 3.6         | <0.001       |          |
| Potatoes, roots and tubers                                              | 70.6                                                         | 80.9         | 2.9                                                                           | 3.0         | 2.9               | 3.3         | 2.8                 | 2.6         | 0.441        |          |
| Fruit <sup>a</sup>                                                      | 53.5                                                         | 77.7         | 2.2                                                                           | 3.1         | 1.7               | 2.7         | 2.7                 | 3.5         | <0.001       |          |
| Eggs                                                                    | 41.5                                                         | 65.3         | 1.7                                                                           | 2.7         | 1.7               | 2.8         | 1.6                 | 2.7         | 0.742        |          |
| Vegetables and green condiment <sup>b</sup>                             | 33.2                                                         | 40.4         | 1.4                                                                           | 1.7         | 1.1               | 1.4         | 1.7                 | 1.9         | <0.001       |          |
| Milk and natural yogurt                                                 | 28.0                                                         | 53.8         | 1.2                                                                           | 2.1         | 0.8               | 1.7         | 1.6                 | 2.4         | <0.001       |          |
| Coffee and tea                                                          | 22.8                                                         | 11.7         | 0.9                                                                           | 0.5         | 0.9               | 0.6         | 1.0                 | 0.5         | 0.251        |          |
| Fruit juice <sup>c</sup>                                                | 21.2                                                         | 46.6         | 0.8                                                                           | 1.7         | 0.8               | 1.6         | 0.8                 | 1.7         | 0.240        |          |
| Fish                                                                    | 9.5                                                          | 41.7         | 0.4                                                                           | 1.8         | 0.3               | 1.5         | 0.5                 | 2.0         | 0.655        |          |
| Cereal, seeds and nuts                                                  | 3.4                                                          | 29.5         | 0.1                                                                           | 0.9         | 0.1               | 1.2         | 0.1                 | 0.6         | 0.370        |          |
| <b>Processed culinary ingredients</b>                                   | <b>303.4</b>                                                 | <b>127.3</b> | <b>12.4</b>                                                                   | <b>4.6</b>  | <b>12.2</b>       | <b>4.4</b>  | <b>12.6</b>         | <b>4.9</b>  | 0.564        |          |
| Sugars <sup>d</sup>                                                     | 150.4                                                        | 113.2        | 5.9                                                                           | 3.9         | 6.4               | 3.8         | 5.4                 | 4.1         | <0.001       |          |
| Vegetable fat <sup>e</sup>                                              | 90.8                                                         | 54.6         | 4.0                                                                           | 2.8         | 3.4               | 2.4         | 4.6                 | 3.1         | <0.001       |          |
| Animal fat <sup>f</sup>                                                 | 62.2                                                         | 64.7         | 2.5                                                                           | 2.7         | 2.4               | 2.5         | 2.7                 | 3.0         | 0.919        |          |
| <b>Processed foods</b>                                                  | <b>133.8</b>                                                 | <b>174.6</b> | <b>5.2</b>                                                                    | <b>6.2</b>  | <b>5.5</b>        | <b>6.5</b>  | <b>4.8</b>          | <b>5.9</b>  | 0.103        |          |
| Pastries <sup>g</sup>                                                   | 43.2                                                         | 111.9        | 1.6                                                                           | 3.8         | 1.7               | 4.3         | 1.5                 | 3.3         | 0.176        |          |
| Processed breads, cookies and cakes <sup>h</sup>                        | 41.1                                                         | 78.8         | 1.7                                                                           | 3.1         | 1.7               | 3.0         | 1.6                 | 3.2         | 0.287        |          |
| Processed meats <sup>i</sup>                                            | 22.5                                                         | 73.2         | 0.8                                                                           | 2.5         | 0.7               | 2.4         | 0.9                 | 2.6         | 0.367        |          |
| Fermented alcoholic beverages (beer and wine)                           | 11.6                                                         | 54.4         | 0.4                                                                           | 2.2         | 0.8               | 2.8         | 0.1                 | 1.1         | <0.001       |          |
| Concentrated juice                                                      | 7.7                                                          | 24.4         | 0.3                                                                           | 1.0         | 0.3               | 1.1         | 0.3                 | 0.9         | 0.876        |          |
| Processed dairy products <sup>j</sup>                                   | 3.8                                                          | 16.6         | 0.1                                                                           | 0.6         | 0.1               | 0.5         | 0.2                 | 0.7         | 0.101        |          |
| Canned food <sup>k</sup>                                                | 3.8                                                          | 27.6         | 0.1                                                                           | 0.8         | 0.1               | 0.9         | 0.1                 | 0.8         | 0.956        |          |
| <b>Ultra-processed foods</b>                                            | <b>452.8</b>                                                 | <b>326.3</b> | <b>17.7</b>                                                                   | <b>10.8</b> | <b>17.0</b>       | <b>10.4</b> | <b>18.4</b>         | <b>11.1</b> | 0.100        |          |
| Industrialized breads, cookies and cereals <sup>l</sup>                 | 110.9                                                        | 164.8        | 4.4                                                                           | 6.3         | 3.3               | 4.9         | 5.6                 | 7.4         | <0.001       |          |
| Industrialized pasta <sup>m</sup>                                       | 100.2                                                        | 112.6        | 4.0                                                                           | 4.2         | 4.3               | 4.5         | 3.6                 | 3.9         | <b>0.031</b> |          |
| Candies <sup>n</sup>                                                    | 62.3                                                         | 114.5        | 2.4                                                                           | 4.4         | 1.6               | 3.3         | 3.2                 | 5.2         | <0.001       |          |
| Sugary drinks (soda, juice and canned nectar and artificial soft drink) | 52.6                                                         | 76.0         | 1.9                                                                           | 2.6         | 2.4               | 3.0         | 1.5                 | 2.2         | <0.001       |          |
| Industrialized sauces and condiment <sup>o</sup> and margarine          | 46.7                                                         | 49.7         | 1.8                                                                           | 1.8         | 1.8               | 1.8         | 1.9                 | 1.9         | 0.708        |          |
| Snacks and fried foods <sup>p</sup>                                     | 38.2                                                         | 87.5         | 1.5                                                                           | 3.3         | 1.6               | 3.5         | 1.4                 | 3.1         | 0.461        |          |
| Sausages (ham, bacon and sausages)                                      | 33.6                                                         | 76.0         | 1.3                                                                           | 2.7         | 1.5               | 2.9         | 1.0                 | 2.4         | <b>0.002</b> |          |
| Ultra-processed dairy products <sup>q</sup>                             | 5.3                                                          | 19.1         | 0.2                                                                           | 0.7         | 0.2               | 0.7         | 0.2                 | 0.6         | 0.648        |          |
| Distilled alcoholic drinks ( <i>caipirinha</i> , brandy and spirit)     | 3.1                                                          | 20.8         | 0.1                                                                           | 0.9         | 0.2               | 1.3         | 0.0                 | 0.2         | <0.001       |          |

(Continued)



Table 2. (Continued)

| NOVA's groups and subgroups | Total calories from consumption by NOVA groups and subgroups |              | Caloric contribution of NOVA groups and subgroups in daily energy consumption |          |                   |          |                     |          |          |
|-----------------------------|--------------------------------------------------------------|--------------|-------------------------------------------------------------------------------|----------|-------------------|----------|---------------------|----------|----------|
|                             |                                                              |              | Total                                                                         |          | Sex               |          |                     |          | p-value* |
|                             |                                                              |              |                                                                               |          | Male<br>(n = 381) |          | Female<br>(n = 359) |          |          |
|                             |                                                              |              | Mean                                                                          | SD       | Mean              | SD       | Mean                | SD       |          |
| (kcal)                      |                                                              | (%)          |                                                                               | (%)      |                   | (%)      |                     |          |          |
| <b>All foods</b>            | <b>2561.0</b>                                                | <b>883.1</b> | <b>100.0</b>                                                                  | <b>-</b> | <b>100.0</b>      | <b>-</b> | <b>100.0</b>        | <b>-</b> | <b>-</b> |

SD, Standard deviation. n, individuals number.

<sup>a</sup> Like bananas, grape, guava, blackberry, watermelon, papaya, strawberry, apple, pear, pineapple, orange, tangerine, peach, persimmon, mango, lemon, avocado, lychee, plum, and fruit salad.

<sup>b</sup> Like cucumber, tomato, lettuce, watercress, chard, peppers, radish, cabbage, gherkin, chayote, spinach, okra, zucchini, carrots, beets, green beans, taioba, broccoli, garlic, onions, chives, parsley, coriander, basil, and mint.

<sup>c</sup> Natural or pulp juice, and coconut water.

<sup>d</sup> White sugar, brown sugar, honey, and *rapadura*.

<sup>e</sup> Sunflower oil, corn oil, soy oil, and olive oil.

<sup>f</sup> Butter, cream, heavy cream, and lard.

<sup>g</sup> Like jellies, *cocada*, *paçoca*, and condensed milk.

<sup>h</sup> Like French bread, and French bread toast.

<sup>i</sup> Like *dobradinha*, pork tail, dried meat, and crackling.

<sup>j</sup> Minas cheese, rennet cheese and ricotta.

<sup>k</sup> Canned sardines, green corn, palm hearts, and olives.

<sup>l</sup> Like bread, sweet and salt cookies, wafer, stuffed cookie, cakes, breakfast cereal, pies and candies.

<sup>m</sup> Like pizza, lasagna, sausage pie, noodles, and *escondidinho*.

<sup>n</sup> Like chocolate, bonbon, whipped cream, bubble gum, lollipop, suspiro, *nhá benta*, caramels, *sorvete quente*, ice cream, popsicle, milkshake, and jelly.

<sup>o</sup> Like mayonnaise, ketchup, condiments, industrialized tomato sauce, pepper sauce, *rosé* sauce and industrialized soups and broths.

<sup>p</sup> Like pre-fried potatoes, breaded, microwave popcorn, chips, hamburgers and hot dogs.

<sup>q</sup> Like creamy curd, parmesan cheese, *mozzarella* cheese, flavored yogurt.

\* Mann-Whitney U test. n = 740.

<https://doi.org/10.1371/journal.pone.0240756.t002>

When the caloric contribution from the processed culinary ingredients was greater, the caloric and energy density content of the diet was lower, and the contents of carbohydrate, lipid, PUFA, fibers, vitamins A, B1, B2, B3, B9, C and E, iron, potassium, sodium, selenium, and copper were higher. Likewise, after adjustments, individuals in the fourth quartile of processed culinary ingredients had lower caloric consumption ( $\beta$  -0.25;  $P < 0.001$ ) and energy density ( $\beta$  -0.17;  $P = 0.001$ ). They also had a higher content of carbohydrate, lipid, SFA, PUFA, cholesterol, and fibers, as well as some micronutrients (vitamins A, B1, B2, B6, B9, C and E, potassium, sodium, selenium, zinc, and copper) compared to farmers in the first quartile (Table 5).

In contrast to what was identified for the group of minimally processed foods, and similar to that found for processed foods, the higher caloric contribution from ultra-processed foods was associated with a greater caloric content of the diet ( $P < 0.001$ ) and lower content of all macro and micronutrients analyzed. This behavior was maintained after adjusted analyzes, in which the individuals in the highest consumption quartile of this food group had higher caloric consumption ( $\beta$  0.17,  $P < 0.001$ ) and lower consumption of all 23 analyzed nutrients (Table 7).

## Discussion

The major finding of this study was the clear identification of the differences between the nutritional profile of the food groups in this rural area, especially between the minimally

**Table 3. Proportion of individuals with adequate nutrient intake and the caloric contribution of minimally processed foods, processed culinary ingredients, processed foods and ultra-processed foods.**

| Proportion of individuals with adequate nutrient intake according to current recommendations | n                      | %   | Minimally processed* |      | p-value†  | Processed culinary ingredients* |      | p-value†  | Processed foods* |     | p-value† | Ultra-processed foods* |      | p-value†  |                  |
|----------------------------------------------------------------------------------------------|------------------------|-----|----------------------|------|-----------|---------------------------------|------|-----------|------------------|-----|----------|------------------------|------|-----------|------------------|
|                                                                                              |                        |     | 50p                  | IQR  |           | 50p                             | IQR  |           | 50p              | IQR |          | 50p                    | IQR  |           |                  |
| Energy density (kcal/g) <sup>a‡</sup>                                                        | Within the recommended | 14  | 1.9                  | 74.1 | 65.2–76.9 | 0.104                           | 14.3 | 11.7–19.7 | <b>0.031</b>     | 0.8 | 0.0–2.9  | <b>0.047</b>           | 10.1 | 7.3–16.2  | <b>0.041</b>     |
|                                                                                              | Inadequate intake      | 726 | 98.1                 | 66.2 | 56.7–74.7 |                                 | 11.9 | 8.9–15.2  |                  | 3.2 | 0.0–7.5  |                        | 15.6 | 9.8–24.3  |                  |
| Carbohydrate (g) <sup>b</sup>                                                                | Within the recommended | 240 | 32.4                 | 67.1 | 56.5–75.2 | 0.268                           | 12.7 | 10.2–16.3 | <b>&lt;0.001</b> | 2.8 | 0.0–6.8  | <b>0.019</b>           | 14.3 | 8.5–23.1  | <b>0.044</b>     |
|                                                                                              | Inadequate intake      | 500 | 67.6                 | 65.7 | 57.0–74.3 |                                 | 11.6 | 8.5–14.4  |                  | 3.5 | 0.0–8.3  |                        | 15.7 | 10.1–24.7 |                  |
| Protein (g) <sup>b</sup>                                                                     | Within the recommended | 269 | 36.4                 | 64.8 | 54.2–72.6 | <b>0.002</b>                    | 12.2 | 8.8–14.9  | 0.742            | 3.3 | 0.0–7.2  | 0.909                  | 17.6 | 11.4–27.9 | <b>&lt;0.001</b> |
|                                                                                              | Inadequate intake      | 471 | 63.6                 | 66.9 | 58.4–75.7 |                                 | 11.8 | 9.0–15.4  |                  | 3.1 | 0.0–7.4  |                        | 14.6 | 8.9–22.6  |                  |
| Lipid (g) <sup>b</sup>                                                                       | Within the recommended | 436 | 58.9                 | 64.9 | 54.5–73.8 | <b>&lt;0.001</b>                | 11.7 | 8.6–14.5  | <b>0.027</b>     | 3.7 | 0.1–8.4  | <b>0.007</b>           | 17.0 | 10.6–26.4 | <b>&lt;0.001</b> |
|                                                                                              | Inadequate intake      | 304 | 41.1                 | 68.3 | 59.5–75.9 |                                 | 12.2 | 9.6–16.2  |                  | 2.5 | 0.0–6.9  |                        | 14.1 | 8.5–20.5  |                  |
| SFA (g) <sup>c</sup>                                                                         | Within the recommended | 572 | 77.3                 | 65.4 | 55.6–74.2 | <b>0.003</b>                    | 11.9 | 8.9–15.0  | 0.073            | 3.5 | 0.0–7.9  | <b>0.022</b>           | 16.4 | 10.2–25.3 | <b>&lt;0.001</b> |
|                                                                                              | Inadequate intake      | 168 | 22.7                 | 68.6 | 59.5–76.5 |                                 | 12.2 | 9.8–16.6  |                  | 2.4 | 0.0–6.7  |                        | 13.7 | 7.4–19.3  |                  |
| PUFA (g) <sup>b</sup>                                                                        | Within the recommended | 410 | 55.4                 | 66.3 | 56.7–74.9 | 0.588                           | 12.0 | 9.1–15.3  | 0.508            | 3.3 | 0.0–7.3  | 0.543                  | 15.6 | 9.8–23.8  | 0.798            |
|                                                                                              | Inadequate intake      | 330 | 44.6                 | 66.3 | 57.0–74.7 |                                 | 11.9 | 8.9–15.1  |                  | 3.0 | 0.0–8.3  |                        | 15.4 | 9.5–24.5  |                  |
| Cholesterol (mg) <sup>b</sup>                                                                | Within the recommended | 737 | 99.6                 | 66.3 | 57.0–74.8 | 0.676                           | 12.0 | 9.0–15.2  | 0.188            | 3.1 | 0.0–7.4  | 0.149                  | 15.5 | 9.7–24.2  | 0.866            |
|                                                                                              | Inadequate intake      | 3   | 0.4                  | 66.7 | 42.2–73.4 |                                 | 20.2 | 9.5–20.6  |                  | 0.0 | 0.0–3.2  |                        | 12.8 | 3.3–48.3  |                  |
| Fibers (g) <sup>b</sup>                                                                      | Within the recommended | 13  | 1.8                  | 73.8 | 68.5–76.7 | <b>0.023</b>                    | 14.0 | 12.0–18.0 | 0.089            | 0.0 | 0.0–3.9  | 0.053                  | 10.1 | 5.5–16.6  | <b>0.024</b>     |
|                                                                                              | Inadequate intake      | 727 | 98.2                 | 66.1 | 56.6–74.7 |                                 | 11.9 | 8.9–15.2  |                  | 3.2 | 0.0–7.5  |                        | 15.6 | 9.8–24.3  |                  |
| Vitamin A (µg) <sup>d</sup>                                                                  | Within the recommended | 243 | 32.8                 | 68.3 | 58.5–76.0 | <b>0.010</b>                    | 11.7 | 8.9–14.8  | 0.612            | 2.9 | 0.0–7.2  | 0.452                  | 13.9 | 8.9–21.4  | <b>0.005</b>     |
|                                                                                              | Inadequate intake      | 497 | 67.2                 | 65.3 | 55.8–73.9 |                                 | 12.1 | 9.0–15.3  |                  | 3.3 | 0.0–7.5  |                        | 16.6 | 10.1–25.2 |                  |
| Vitamin B1 (mg) <sup>d</sup>                                                                 | Within the recommended | 738 | 99.7                 | 66.3 | 56.9–74.8 | 0.858                           | 12.0 | 9.0–15.2  | 0.054            | 3.1 | 0.0–7.4  | 0.760                  | 15.5 | 9.7–24.2  | 0.333            |
|                                                                                              | Inadequate intake      | 2   | 0.3                  | 67.3 | 59.9–74.8 |                                 | 18.7 | 17.4–19.9 |                  | 3.6 | 0.0–7.1  |                        | 10.4 | 5.3–15.6  |                  |
| Vitamin B2 (mg) <sup>d</sup>                                                                 | Within the recommended | 433 | 58.5                 | 66.5 | 58.1–74.8 | 0.380                           | 11.8 | 8.8–15.2  | 0.202            | 3.3 | 0.0–8.0  | 0.241                  | 15.0 | 9.0–23.1  | 0.039            |
|                                                                                              | Inadequate intake      | 307 | 41.5                 | 65.9 | 55.4–74.8 |                                 | 12.3 | 9.4–15.2  |                  | 2.9 | 0.0–6.9  |                        | 16.9 | 10.2–25.9 |                  |
| Vitamin B3 (mg) <sup>d</sup>                                                                 | Within the recommended | 725 | 98.0                 | 66.3 | 57.0–74.8 | 0.289                           | 12.0 | 9.0–15.2  | 0.730            | 3.1 | 0.0–7.3  | 0.328                  | 15.4 | 9.6–24.2  | 0.332            |
|                                                                                              | Inadequate intake      | 15  | 2.0                  | 62.6 | 53.4–70.2 |                                 | 12.9 | 7.6–14.4  |                  | 5.8 | 0.2–9.8  |                        | 18.7 | 12.5–28.3 |                  |
| Vitamin B6 (mg) <sup>d</sup>                                                                 | Within the recommended | 441 | 59.6                 | 68.6 | 59.7–76.2 | <b>&lt;0.001</b>                | 11.6 | 8.8–14.7  | <b>0.034</b>     | 2.8 | 0.0–7.2  | 0.290                  | 13.8 | 8.2–21.3  | <b>&lt;0.001</b> |
|                                                                                              | Inadequate intake      | 299 | 40.4                 | 63.0 | 52.8–71.2 |                                 | 12.4 | 9.3–15.9  |                  | 3.6 | 0.0–8.3  |                        | 19.1 | 11.9–28.1 |                  |

(Continued)

Table 3. (Continued)

| Proportion of individuals with adequate nutrient intake according to current recommendations | n                      | %   | Minimally processed* |      | p-value†  | Processed culinary ingredients* |      | p-value†  | Processed foods* |      | p-value† | Ultra-processed foods* |      | p-value†  |              |
|----------------------------------------------------------------------------------------------|------------------------|-----|----------------------|------|-----------|---------------------------------|------|-----------|------------------|------|----------|------------------------|------|-----------|--------------|
|                                                                                              |                        |     | 50p                  | IQR  |           | 50p                             | IQR  |           | 50p              | IQR  |          | 50p                    | IQR  |           |              |
|                                                                                              |                        |     |                      |      |           |                                 |      |           |                  |      |          |                        |      |           |              |
| Vitamin B9 (µg) <sup>d</sup>                                                                 | Within the recommended | 61  | 8.2                  | 68.5 | 58.2–76.0 | 0.199                           | 12.1 | 9.6–13.6  | 0.773            | 3.9  | 0.0–11.4 | 0.519                  | 16.0 | 6.8–19.2  | 0.085        |
|                                                                                              | Inadequate intake      | 679 | 91.8                 | 66.1 | 56.5–74.6 |                                 | 11.9 | 8.9–15.3  |                  | 3.1  | 0.0–7.3  |                        | 15.4 | 9.8–24.5  |              |
| Vitamin C (mg) <sup>d</sup>                                                                  | Within the recommended | 191 | 25.8                 | 67.4 | 58.3–75.2 | 0.127                           | 12.3 | 9.7–15.8  | <b>0.041</b>     | 2.0  | 0.0–6.9  | <b>0.027</b>           | 14.7 | 9.1–21.7  | 0.105        |
|                                                                                              | Inadequate intake      | 549 | 74.2                 | 65.9 | 56.4–74.6 |                                 | 11.8 | 8.8–14.9  |                  | 3.4  | 0.0–7.9  |                        | 15.7 | 9.8–25.0  |              |
| Vitamin E (mg) <sup>d</sup>                                                                  | Within the recommended | 718 | 97.0                 | 66.3 | 56.9–74.8 | 0.961                           | 12.0 | 9.1–15.3  | <b>0.003</b>     | 3.1  | 0.0–7.5  | 0.935                  | 15.4 | 9.6–24.1  | 0.179        |
|                                                                                              | Inadequate intake      | 22  | 3.0                  | 64.9 | 58.6–75.6 |                                 | 8.4  | 5.9–12.4  |                  | 3.4  | 0.3–6.4  |                        | 18.3 | 13.0–27.7 |              |
| Calcium (mg) <sup>d</sup>                                                                    | Inadequate intake      | 740 | 100.0                | 66.3 | 56.9–74.8 | -                               | 12.0 | 9.0–15.2  | -                | 3.1  | 0.0–7.4  | -                      | 15.5 | 9.7–24.2  | -            |
| Iron (mg) <sup>d</sup>                                                                       | Within the recommended | 734 | 99.2                 | 66.4 | 57.0–74.8 | 0.117                           | 12.0 | 9.0–15.3  | 0.181            | 3.1  | 0.0–7.4  | 0.744                  | 15.4 | 9.6–24.1  | <b>0.014</b> |
|                                                                                              | Inadequate intake      | 6   | 0.8                  | 56.6 | 48.5–65.3 |                                 | 9.8  | 6.2–13.2  |                  | 1.4  | 1.1–13.5 |                        | 29.1 | 18.9–39.5 |              |
| Phosphorus (mg) <sup>d</sup>                                                                 | Within the recommended | 735 | 99.3                 | 66.4 | 57.1–74.8 | <b>0.002</b>                    | 12.0 | 9.0–15.2  | 0.424            | 3.1  | 0.0–7.4  | <b>0.007</b>           | 15.4 | 9.6–24.1  | <b>0.006</b> |
|                                                                                              | Inadequate intake      | 5   | 0.7                  | 37.2 | 31.0–43.5 |                                 | 13.2 | 11.5–16.5 |                  | 14.2 | 6.9–16.1 |                        | 32.8 | 28.3–40.3 |              |
| Potassium (mg) <sup>b</sup>                                                                  | Within the recommended | 3   | 0.4                  | 79.2 | 74.9–82.6 | <b>0.032</b>                    | 15.6 | 6.5–19.6  | 0.591            | 0.0  | 0.0–1.6  | 0.097                  | 5.5  | 1.8–12.7  | <b>0.047</b> |
|                                                                                              | Inadequate intake      | 737 | 99.6                 | 66.2 | 56.9–74.7 |                                 | 12.0 | 9.0–15.2  |                  | 3.2  | 0.0–7.4  |                        | 15.5 | 9.8–24.2  |              |
| Sodium (mg) <sup>b</sup>                                                                     | Within the recommended | 126 | 17.0                 | 63.5 | 54.5–72.5 | <b>0.011</b>                    | 12.5 | 9.4–14.6  | 0.625            | 3.3  | 0.0–7.2  | 0.516                  | 19.3 | 12.4–27.5 | <b>0.002</b> |
|                                                                                              | Inadequate intake      | 614 | 83.0                 | 66.6 | 57.5–75.0 |                                 | 11.9 | 8.9–15.3  |                  | 3.1  | 0.0–7.5  |                        | 15.0 | 9.3–23.3  |              |
| Selenium (µg) <sup>d</sup>                                                                   | Within the recommended | 723 | 97.7                 | 66.3 | 56.9–74.8 | 0.507                           | 11.9 | 9.0–15.2  | 0.872            | 3.1  | 0.0–7.4  | 0.119                  | 15.5 | 9.6–24.2  | 0.938        |
|                                                                                              | Inadequate intake      | 17  | 2.3                  | 64.3 | 59.2–71.9 |                                 | 13.4 | 7.5–16.5  |                  | 6.2  | 2.0–13.3 |                        | 14.6 | 10.6–22.3 |              |
| Zinc (mg) <sup>d</sup>                                                                       | Within the recommended | 369 | 49.9                 | 66.3 | 57.2–74.9 | 0.281                           | 11.6 | 8.7–15.0  | 0.071            | 3.2  | 0.0–7.3  | 0.648                  | 15.4 | 9.5–23.6  | 0.555        |
|                                                                                              | Inadequate intake      | 371 | 50.1                 | 66.2 | 56.4–74.6 |                                 | 12.3 | 9.6–15.3  |                  | 3.1  | 0.0–7.8  |                        | 15.7 | 9.8–24.3  |              |
| Copper (µg) <sup>d</sup>                                                                     | Within the recommended | 732 | 98.9                 | 66.2 | 56.8–74.8 | 0.454                           | 11.9 | 9.0–15.2  | 0.750            | 3.1  | 0.0–7.4  | 0.512                  | 15.4 | 9.7–24.2  | 0.846        |
|                                                                                              | Inadequate intake      | 8   | 1.1                  | 68.9 | 63.4–76.7 |                                 | 12.4 | 9.5–15.9  |                  | 1.1  | 0.0–6.6  |                        | 15.7 | 11.8–19.7 |              |

n, individuals number. 50p, median. IQR, interquartile range (25<sup>th</sup> percentile to 75<sup>th</sup> percentile). SFA, saturated fatty acids. PUFA, polyunsaturated fatty acids.

<sup>a</sup> WCRF & AICR (2007) [50]

<sup>b</sup> WHO (2003) [51]

<sup>c</sup> WHO (2018) [52]

<sup>d</sup> FNB (1991–2011) [53]; Complete recommendations in S1 Table.

n = 740.

\* Energy-adjusted and attenuated nutrients.

† Mann-Whitney U test.

‡ Calculated for the solid fraction of the diet, corresponding to the sum of calories from solid foods divided by the quantity in grams of these foods<sup>a</sup>.

<https://doi.org/10.1371/journal.pone.0240756.t003>

**Table 4. Diet's nutritional profile according to the caloric contribution of the consumption of minimally processed foods by Brazilian farmers.**

| Nutrients*                 | 1 <sup>st</sup> quartile |                | 2 <sup>nd</sup> quartile |                | 3 <sup>rd</sup> quartile |               | 4 <sup>th</sup> quartile |               | p-value†         | Crude‡ |                  | Ajusted‡ |                  |
|----------------------------|--------------------------|----------------|--------------------------|----------------|--------------------------|---------------|--------------------------|---------------|------------------|--------|------------------|----------|------------------|
|                            | 50p                      | IQR            | 50p                      | IQR            | 50p                      | IQR           | 50p                      | IQR           |                  | β      | p-value          | β        | p-value          |
| Calorie (kcal)             | 2137.9                   | 1834.2–2502.0  | 2099.5                   | 1795.6–2453.3  | 2017.1                   | 1671.7–2380.8 | 1945.9                   | 1706.3–2301.5 | <b>0.003</b>     | -0.19  | <b>&lt;0.001</b> | -0.16    | <b>0.001</b>     |
| Kilojoules (kJ)            | 8944.9                   | 7674.2–10468.2 | 8784.2                   | 7512.8–10264.7 | 8439.4                   | 6994.4–9961.1 | 8141.7                   | 7139.3–9629.4 |                  |        |                  |          |                  |
| Energy density (kcal/g)§   | 1.9                      | 1.7–2.1        | 1.9                      | 1.7–2.1        | 1.9                      | 1.6–2.2       | 1.9                      | 1.7–2.2       | 0.997            | 0.00   | 0.988            | -0.01    | 0.795            |
| Carbohydrate (%)           | 49.9                     | 42.1–59.9      | 49.7                     | 41.1–59.6      | 52.7                     | 41.5–62.1     | 52.8                     | 44.7–60.9     | 0.177            | 0.08   | 0.115            | 0.06     | 0.286            |
| Protein (%)                | 14.5                     | 12.3–17.4      | 16.1                     | 12.8–18.1      | 16.4                     | 13.2–20.4     | 18.0                     | 14.5–21.9     | <b>&lt;0.001</b> | 0.31   | <b>&lt;0.001</b> | 0.30     | <b>&lt;0.001</b> |
| Lipid (%)                  | 29.6                     | 25.8–36.6      | 32.0                     | 27.1–38.2      | 32.7                     | 27.6–39.7     | 33.1                     | 28.8–39.8     | <b>0.002</b>     | 0.18   | <b>0.001</b>     | 0.17     | <b>0.001</b>     |
| SFA (%)                    | 7.6                      | 6.4–9.0        | 8.0                      | 6.6–9.8        | 8.1                      | 6.8–9.9       | 8.4                      | 6.8–10.1      | <b>0.034</b>     | 0.14   | <b>0.006</b>     | 0.13     | <b>0.013</b>     |
| PUFA (%)                   | 7.2                      | 6.0–9.1        | 8.2                      | 6.5–10.2       | 8.8                      | 7.0–10.6      | 8.8                      | 7.3–10.4      | <b>&lt;0.001</b> | 0.25   | <b>&lt;0.001</b> | 0.25     | <b>&lt;0.001</b> |
| Cholesterol (mg/1000 kcal) | 108.7                    | 88.0–134.0     | 117.0                    | 94.2–147.3     | 120.1                    | 101.2–151.1   | 130.3                    | 106.7–163.2   | <b>&lt;0.001</b> | 0.24   | <b>&lt;0.001</b> | 0.22     | <b>&lt;0.001</b> |
| Fibers (g/1000 kcal)       | 9.7                      | 7.6–12.7       | 11.0                     | 8.6–13.9       | 11.1                     | 8.9–14.6      | 12.6                     | 10.3–16.3     | <b>&lt;0.001</b> | 0.33   | <b>&lt;0.001</b> | 0.32     | <b>&lt;0.001</b> |
| Vitamin A (µg/1000 kcal)   | 212.6                    | 162.2–261.0    | 217.8                    | 166.4–296.7    | 234.4                    | 178.5–325.4   | 248.5                    | 182.1–347.8   | <b>&lt;0.001</b> | 0.18   | <b>&lt;0.001</b> | 0.17     | <b>0.001</b>     |
| Vitamin B1 (mg/1000 kcal)  | 0.8                      | 0.7–1.0        | 0.9                      | 0.7–1.1        | 0.9                      | 0.8–1.2       | 1.1                      | 0.8–1.3       | <b>&lt;0.001</b> | 0.32   | <b>&lt;0.001</b> | 0.31     | <b>&lt;0.001</b> |
| Vitamin B2 (mg/1000 kcal)  | 0.5                      | 0.4 - .6       | 0.5                      | 0.4–0.6        | 0.5                      | 0.4–0.7       | 0.5                      | 0.4 - .7      | <b>0.001</b>     | 0.17   | <b>0.001</b>     | 0.14     | <b>0.006</b>     |
| Vitamin B3 (mg/1000 kcal)  | 8.5                      | 6.8–10.2       | 9.4                      | 7.5–11.4       | 9.7                      | 7.4–12.0      | 11.0                     | 8.5–13.3      | <b>&lt;0.001</b> | 0.33   | <b>&lt;0.001</b> | 0.33     | <b>&lt;0.001</b> |
| Vitamin B6 (mg/1000 kcal)  | 0.6                      | 0.5–0.7        | 0.6                      | 0.5–0.8        | 0.6                      | 0.5–0.8       | 0.7                      | 0.6 - .9      | <b>&lt;0.001</b> | 0.33   | <b>&lt;0.001</b> | 0.31     | <b>&lt;0.001</b> |
| Vitamin B9 (µg/1000 kcal)  | 83.7                     | 62.3–116.9     | 94.0                     | 72.4–120.8     | 95.9                     | 69.7–123.7    | 103.3                    | 79.1–140.4    | <b>&lt;0.001</b> | 0.21   | <b>&lt;0.001</b> | 0.19     | <b>&lt;0.001</b> |
| Vitamin C (mg/1000 kcal)   | 42.8                     | 28.6–63.1      | 43.3                     | 31.0–64.1      | 47.8                     | 32.7–68.5     | 48.6                     | 31.0–71.5     | 0.209            | 0.13   | <b>0.015</b>     | 0.15     | <b>0.004</b>     |
| Vitamin E (mg/1000 kcal)   | 10.4                     | 8.4–13.7       | 11.6                     | 8.9–15.4       | 12.6                     | 9.5–15.9      | 12.9                     | 10.5–15.8     | <b>&lt;0.001</b> | 0.23   | <b>&lt;0.001</b> | 0.22     | <b>&lt;0.001</b> |
| Calcium (mg/1000 kcal)     | 147.5                    | 115.6–190.0    | 148.6                    | 116.2–188.1    | 152.5                    | 125.8–197.3   | 172.2                    | 139.0–230.4   | <b>&lt;0.001</b> | 0.19   | <b>&lt;0.001</b> | 0.19     | <b>&lt;0.001</b> |
| Iron (mg/1000 kcal)        | 6.0                      | 4.7–7.8        | 6.7                      | 5.4–7.9        | 6.7                      | 5.4–8.7       | 7.5                      | 5.8–9.2       | <b>&lt;0.001</b> | 0.16   | <b>0.002</b>     | 0.14     | <b>0.009</b>     |
| Phosphorus (mg/1000 kcal)  | 418.3                    | 338.0–524.7    | 458.5                    | 364.7–533.9    | 473.4                    | 379.2–583.8   | 525.1                    | 430.3–640.9   | <b>&lt;0.001</b> | 0.31   | <b>&lt;0.001</b> | 0.30     | <b>&lt;0.001</b> |
| Potassium (mg/1000 kcal)   | 1091.2                   | 883.9–1274.1   | 1151.3                   | 962.5–1342.5   | 1195.6                   | 995.9–1482.3  | 1294.4                   | 1104.3–1590.9 | <b>&lt;0.001</b> | 0.32   | <b>&lt;0.001</b> | 0.29     | <b>&lt;0.001</b> |
| Sodium (mg/1000 kcal)      | 1118.0                   | 940.0–1493.6   | 1272.7                   | 968.1–1704.9   | 1305.4                   | 986.7–1756.3  | 1394.4                   | 1073.4–1847.7 | <b>&lt;0.001</b> | 0.22   | <b>&lt;0.001</b> | 0.22     | <b>&lt;0.001</b> |
| Selenium (µg/1000 kcal)    | 33.8                     | 27.9–41.6      | 39.5                     | 29.8–47.8      | 39.1                     | 31.5–51.1     | 42.3                     | 33.7–54.2     | <b>&lt;0.001</b> | 0.29   | <b>&lt;0.001</b> | 0.25     | <b>&lt;0.001</b> |
| Zinc (mg/1000 kcal)        | 3.6                      | 2.9–4.6        | 3.9                      | 3.2–4.8        | 4.1                      | 3.1–5.0       | 4.1                      | 3.4–5.2       | <b>0.018</b>     | 0.16   | <b>0.003</b>     | 0.17     | <b>0.001</b>     |
| Copper (µg/1000 kcal)      | 44.7                     | 39.4–56.1      | 50.0                     | 40.0–60.3      | 49.7                     | 40.7–63.4     | 56.5                     | 45.8–66.7     | <b>&lt;0.001</b> | 0.29   | <b>&lt;0.001</b> | 0.27     | <b>&lt;0.001</b> |

n, individuals number. 50p, median. IQR, interquartile range (25<sup>th</sup> percentile to 75<sup>th</sup> percentile). β, regression coefficient. 95% IC, 95% confidence interval. SFA, saturated fatty acids. PUFA, polyunsaturated fatty acids.

n = 740.

\* Energy-adjusted and attenuated nutrients.

† Kruskal-Wallis test.

‡ Linear regression. Adjusted Model by variables with p < 0.2 in the binary analyzes (according S2 Table).

§ Calculated for the solid fraction of the diet, corresponding to the sum of calories from solid foods divided by the quantity in grams of these foods [50].

<https://doi.org/10.1371/journal.pone.0240756.t004>

Table 5. Diet's nutritional profile according to the caloric contribution of the consumption of processed culinary ingredients by Brazilian farmers.

| Nutrients*                 | 1 <sup>st</sup> quartile |                | 2 <sup>nd</sup> quartile |                | 3 <sup>rd</sup> quartile |                | 4 <sup>th</sup> quartile |               | p-value† | Crude‡ |         | Adjusted‡ |         |
|----------------------------|--------------------------|----------------|--------------------------|----------------|--------------------------|----------------|--------------------------|---------------|----------|--------|---------|-----------|---------|
|                            | 50p                      | IQR            | 50p                      | IQR            | 50p                      | IQR            | 50p                      | IQR           |          | β      | p-value | β         | p-value |
| Calorie (kcal)             | 2221.3                   | 1916.5–2623.1  | 2026.1                   | 1697.2–2410.8  | 2032.1                   | 1721.3–2453.3  | 1923.3                   | 1665.3–2192.7 | <0.001   | -0.29  | <0.001  | -0.25     | <0.001  |
| Kilojoules (kJ)            | 9293.8                   | 8018.6–10974.9 | 8477.2                   | 7101.2–10086.8 | 8502.1                   | 7202.1–10264.7 | 8047.1                   | 6967.5–9174.3 |          |        |         |           |         |
| Energy density (kcal/g)§   | 2.0                      | 1.8–2.2        | 1.9                      | 1.7–2.1        | 1.9                      | 1.7–2.2        | 1.8                      | 1.6–2.1       | 0.002    | -0.20  | <0.001  | -0.17     | 0.001   |
| Carbohydrate (%)           | 45.9                     | 37.7–54.8      | 51.8                     | 42.1–60.1      | 52.2                     | 43.4–61.1      | 55.8                     | 48.5–66.1     | <0.001   | 0.36   | <0.001  | 0.32      | 0.001   |
| Protein (%)                | 15.9                     | 12.8–18.5      | 16.4                     | 13.2–20.3      | 15.8                     | 13.0–20.4      | 16.5                     | 13.5–19.2     | 0.433    | 0.08   | 0.150   | 0.04      | 0.426   |
| Lipid (%)                  | 30.9                     | 24.8–35.7      | 31.5                     | 27.1–39.9      | 30.9                     | 26.3–37.7      | 33.6                     | 28.9–41.0     | <0.001   | 0.22   | <0.001  | 0.18      | <0.001  |
| SFA (%)                    | 7.8                      | 6.4–9.5        | 8.1                      | 6.7–10.0       | 7.8                      | 6.6–9.5        | 8.4                      | 7.0–10.1      | 0.059    | 0.15   | 0.004   | 0.12      | 0.016   |
| PUFA (%)                   | 7.4                      | 5.8–9.2        | 8.4                      | 6.7–10.1       | 8.1                      | 6.3–10.2       | 9.2                      | 7.5–11.4      | <0.001   | 0.34   | <0.001  | 0.30      | <0.001  |
| Cholesterol (mg/1000 kcal) | 119.3                    | 90.7–141.1     | 120.4                    | 98.9–149.7     | 114.7                    | 94.6–146.0     | 120.5                    | 99.2–155.2    | 0.312    | 0.14   | 0.009   | 0.11      | 0.030   |
| Fibers (g/1000 kcal)       | 10.2                     | 8.0–13.1       | 11.4                     | 8.7–14.5       | 11.4                     | 8.8–15.1       | 11.8                     | 9.4–15.1      | 0.002    | 0.18   | 0.001   | 0.14      | 0.006   |
| Vitamin A (μg/1000 kcal)   | 209.6                    | 165.7–274.9    | 231.8                    | 178.3–336.5    | 221.3                    | 166.2–301.7    | 225.9                    | 189.3–321.5   | 0.048    | 0.11   | 0.030   | 0.10      | 0.049   |
| Vitamin B1 (mg/1000 kcal)  | 0.8                      | 0.7–1.1        | 0.9                      | 0.7–1.2        | 0.9                      | 0.7–1.2        | 1.0                      | 0.8–1.2       | <0.001   | 0.24   | <0.001  | 0.21      | <0.001  |
| Vitamin B2 (mg/1000 kcal)  | 0.5                      | 0.4–0.6        | 0.5                      | 0.4–0.7        | 0.5                      | 0.4–0.6        | 0.6                      | 0.5–0.7       | 0.002    | 0.18   | 0.001   | 0.15      | 0.003   |
| Vitamin B3 (mg/1000 kcal)  | 8.7                      | 7.0–11.2       | 9.8                      | 7.7–12.2       | 9.5                      | 7.4–11.9       | 9.9                      | 8.1–12.0      | 0.019    | 0.12   | 0.016   | 0.08      | 0.093   |
| Vitamin B6 (mg/1000 kcal)  | 0.6                      | 0.5–0.8        | 0.7                      | 0.5–0.8        | 0.6                      | 0.5–0.8        | 0.7                      | 0.5–0.8       | 0.064    | 0.13   | 0.011   | 0.10      | 0.044   |
| Vitamin B9 (μg/1000 kcal)  | 83.5                     | 63.4–117.9     | 91.5                     | 66.8–131.7     | 98.7                     | 73.8–128.8     | 99.3                     | 80.7–128.7    | 0.002    | 0.16   | 0.003   | 0.12      | 0.016   |
| Vitamin C (mg/1000 kcal)   | 40.4                     | 27.5–62.3      | 47.1                     | 30.9–68.6      | 46.6                     | 31.0–64.4      | 50.4                     | 33.3–72.2     | 0.009    | 0.15   | 0.004   | 0.13      | 0.009   |
| Vitamin E (mg/1000 kcal)   | 10.4                     | 7.7–13.3       | 12.2                     | 9.1–15.2       | 11.9                     | 9.0–14.9       | 13.7                     | 11.1–17.2     | <0.001   | 0.38   | <0.001  | 0.33      | <0.001  |
| Calcium (mg/1000 kcal)     | 155.2                    | 121.3–209.1    | 154.2                    | 128.3–204.3    | 151.5                    | 125.4–194.5    | 154.0                    | 124.1–195.2   | 0.935    | -0.05  | 0.301   | -0.09     | 0.081   |
| Iron (mg/1000 kcal)        | 6.2                      | 5.1–7.6        | 6.7                      | 5.3–8.6        | 6.8                      | 5.4–9.1        | 7.2                      | 5.9–8.7       | 0.001    | 0.12   | 0.018   | 0.10      | 0.059   |
| Phosphorus (mg/1000 kcal)  | 449.8                    | 364.1–547.3    | 465.0                    | 379.0–582.3    | 465.0                    | 382.6–579.2    | 488.4                    | 390.1–568.7   | 0.162    | 0.11   | 0.043   | 0.06      | 0.187   |
| Potassium (mg/1000 kcal)   | 1104.3                   | 931.5–1324.4   | 1196.3                   | 970.0–1431.1   | 1143.4                   | 964.2–1438.8   | 1277.3                   | 1060.2–1504.1 | <0.001   | 0.23   | <0.001  | 0.19      | <0.001  |
| Sodium (mg/1000 kcal)      | 1135.8                   | 885.4–1490.6   | 1305.4                   | 986.7–1770.2   | 1248.8                   | 959.5–1638.8   | 1402.4                   | 1084.8–1836.6 | <0.001   | 0.24   | <0.001  | 0.22      | <0.001  |
| Selenium (μg/1000 kcal)    | 36.3                     | 27.6–45.2      | 40.5                     | 30.9–51.4      | 37.6                     | 30.2–48.3      | 40.6                     | 34.1–50.5     | <0.001   | 0.22   | <0.001  | 0.18      | <0.001  |
| Zinc (mg/1000 kcal)        | 3.8                      | 3.0–4.9        | 4.1                      | 3.3–5.0        | 3.8                      | 3.1–4.9        | 4.2                      | 3.2–5.0       | 0.120    | 0.11   | 0.030   | 0.10      | 0.048   |
| Copper (μg/1000 kcal)      | 46.8                     | 38.7–57.2      | 50.9                     | 40.9–62.2      | 49.0                     | 40.5–61.6      | 54.8                     | 44.2–64.8     | <0.001   | 0.22   | <0.001  | 0.17      | 0.001   |

n, individuals number. 50p, median. IQR, interquartile range (25<sup>th</sup> percentile to 75<sup>th</sup> percentile). β, regression coefficient. 95% IC, 95% confidence interval. SFA, saturated fatty acids. PUFA, polyunsaturated fatty acids.

n = 740.

\* Energy-adjusted and attenuated nutrients.

† Kruskal-Wallis test.

‡ Linear regression. Adjusted Model by variables with p < 0.2 in the binary analyzes (according S2 Table).

§ Calculated for the solid fraction of the diet, corresponding to the sum of calories from solid foods divided by the quantity in grams of these foods [50].

The higher caloric contribution from processed foods was associated with the greater caloric and density content of the diet and the lower content of the evaluated nutrients, except SFA, vitamin C, calcium and zinc, which did not show statistical differences. Still, after adjustments, individuals in the fourth quartile of processed foods had higher caloric intake (β 0.16, P<0.001) and energy density (β 0.13, P = 0.013), and lower consumption of 17 of the 23 macro and micronutrients evaluated (Table 6).

<https://doi.org/10.1371/journal.pone.0240756.t005>

Table 6. Diet's nutritional profile according to the caloric contribution of the consumption of processed foods by Brazilian farmers.

| Nutrients*                 | 1 <sup>st</sup> quartile |               | 2 <sup>nd</sup> quartile |                | 3 <sup>rd</sup> quartile |                | 4 <sup>th</sup> quartile |                | p-value† | Crude‡ |         | Adjusted‡ |         |
|----------------------------|--------------------------|---------------|--------------------------|----------------|--------------------------|----------------|--------------------------|----------------|----------|--------|---------|-----------|---------|
|                            | 50p                      | IQR           | 50p                      | IQR            | 50p                      | IQR            | 50p                      | IQR            |          | β      | p-value | β         | p-value |
| Calorie (kcal)             | 1943.3                   | 1674.0–2244.8 | 2078.4                   | 1782.7–2448.4  | 2072.6                   | 1812.1–2504.2  | 2127.7                   | 1859.7–2510.4  | <0.001   | 0.23   | <0.001  | 0.16      | <0.001  |
| Kilojoules (kJ)            | 8130.7                   | 7004.0–9392.2 | 8695.9                   | 7458.6–10243.9 | 8671.6                   | 7581.6–10477.7 | 8902.3                   | 7781.0–10503.6 |          |        |         |           |         |
| Energy density (kcal/g)§   | 1.8                      | 1.6–2.1       | 1.9                      | 1.7–2.2        | 1.9                      | 1.7–2.1        | 1.9                      | 1.7–2.1        | 0.008    | 0.13   | 0.012   | 0.13      | 0.013   |
| Carbohydrate (%)           | 54.9                     | 47.4–62.2     | 50.4                     | 41.5–58.9      | 49.7                     | 40.5–59.6      | 48.5                     | 39.7–59.3      | <0.001   | -0.20  | <0.001  | -0.14     | 0.002   |
| Protein (%)                | 16.9                     | 14.0–21.6     | 16.4                     | 12.8–19.2      | 15.9                     | 13.1–19.2      | 15.4                     | 12.4–17.9      | 0.003    | -0.17  | 0.001   | -0.13     | 0.008   |
| Lipid (%)                  | 33.8                     | 28.7–41.3     | 31.2                     | 27.5–38.4      | 32.0                     | 26.3–36.7      | 30.4                     | 25.3–37.1      | 0.001    | -0.18  | <0.001  | -0.12     | 0.009   |
| SFA (%)                    | 8.3                      | 6.9–10.2      | 8.1                      | 6.6–9.8        | 7.8                      | 6.6–9.7        | 7.7                      | 6.5–9.6        | 0.107    | -0.12  | 0.014   | -0.07     | 0.158   |
| PUFA (%)                   | 9.4                      | 7.4–11.0      | 8.0                      | 6.4–10.0       | 8.0                      | 6.4–9.8        | 7.5                      | 6.1–9.7        | <0.001   | -0.25  | <0.001  | -0.19     | <0.001  |
| Cholesterol (mg/1000 kcal) | 123.7                    | 101.7–158.7   | 117.8                    | 100.2–144.6    | 117.0                    | 93.9–149.9     | 117.5                    | 89.8–137.8     | 0.040    | -0.16  | 0.001   | -0.12     | 0.014   |
| Fibers (g/1000 kcal)       | 12.0                     | 10.1–15.7     | 11.3                     | 8.8–13.7       | 10.5                     | 8.4–13.4       | 10.5                     | 8.1–14.2       | <0.001   | -0.20  | <0.001  | -0.15     | 0.003   |
| Vitamin A (µg/1000 kcal)   | 238.1                    | 175.7–342.5   | 231.2                    | 187.7–306.7    | 223.2                    | 174.3–288.3    | 207.0                    | 162.2–295.1    | 0.022    | -0.14  | 0.007   | -0.09     | 0.066   |
| Vitamin B1 (mg/1000 kcal)  | 1.1                      | 0.8–1.3       | 0.9                      | 0.7–1.1        | 0.8                      | 0.7–1.2        | 0.8                      | 0.7–1.1        | 0.001    | -0.28  | <0.001  | -0.23     | <0.001  |
| Vitamin B2 (mg/1000 kcal)  | 0.5                      | 0.4–0.7       | 0.5                      | 0.4–0.6        | 0.5                      | 0.4–0.6        | 0.5                      | 0.4–0.6        | 0.007    | -0.14  | 0.007   | -0.07     | 0.125   |
| Vitamin B3 (mg/1000 kcal)  | 10.3                     | 8.3–13.0      | 9.8                      | 7.4–11.9       | 9.1                      | 7.1–11.1       | 8.7                      | 7.0–11.1       | <0.001   | -0.22  | <0.001  | -0.18     | <0.001  |
| Vitamin B6 (mg/1000 kcal)  | 0.7                      | 0.5–0.9       | 0.6                      | 0.5–0.8        | 0.6                      | 0.5–0.7        | 0.6                      | 0.5–0.8        | <0.001   | -0.21  | <0.001  | -0.16     | 0.001   |
| Vitamin B9 (µg/1000 kcal)  | 99.4                     | 78.3–139.7    | 89.8                     | 68.7–115.6     | 92.8                     | 68.2–122.9     | 93.1                     | 66.6–130.1     | 0.03     | -0.09  | 0.081   | -0.05     | 0.354   |
| Vitamin C (mg/1000 kcal)   | 48.5                     | 31.5–70.3     | 46.1                     | 30.7–67.1      | 43.3                     | 30.9–63.4      | 44.3                     | 28.6–63.4      | 0.165    | -0.12  | 0.014   | -0.10     | 0.041   |
| Vitamin E (mg/1000 kcal)   | 13.3                     | 10.9–16.7     | 11.9                     | 8.8–15.1       | 11.8                     | 8.6–15.1       | 10.6                     | 8.6–14.1       | <0.001   | -0.22  | <0.001  | -0.16     | 0.001   |
| Calcium (mg/1000 kcal)     | 153.0                    | 123.6–210.2   | 154.2                    | 119.4–199.4    | 150.2                    | 128.1–193.5    | 158.7                    | 127.5–196.5    | 0.968    | -0.03  | 0.591   | 0.02      | 0.686   |
| Iron (mg/1000 kcal)        | 7.3                      | 5.9–9.1       | 6.6                      | 5.2–8.4        | 6.5                      | 5.3–8.2        | 6.6                      | 5.0–8.1        | <0.001   | -0.17  | 0.001   | -0.11     | 0.024   |
| Phosphorus (mg/1000 kcal)  | 492.2                    | 403.5–618.8   | 466.4                    | 366.6–562.1    | 458.5                    | 379.0–557.9    | 449.0                    | 356.8–537.3    | 0.003    | -0.19  | <0.001  | -0.14     | 0.004   |
| Potassium (mg/1000 kcal)   | 1243.4                   | 1047.5–1569.6 | 1175.5                   | 972.8–1398.1   | 1146.1                   | 943.1–1384.3   | 1139.0                   | 932.5–1345.6   | 0.001    | -0.21  | <0.001  | -0.15     | 0.002   |
| Sodium (mg/1000 kcal)      | 1445.0                   | 1091.0–1877.8 | 1239.9                   | 967.8–1582.4   | 1230.6                   | 955.1–1585.1   | 1194.1                   | 914.8–1597.6   | <0.001   | -0.19  | <0.001  | -0.15     | 0.003   |
| Selenium (µg/1000 kcal)    | 43.9                     | 33.7–54.0     | 39.0                     | 31.4–47.5      | 36.0                     | 28.5–46.7      | 36.6                     | 28.6–45.8      | <0.001   | -0.23  | <0.001  | -0.17     | 0.001   |
| Zinc (mg/1000 kcal)        | 4.1                      | 3.2–5.3       | 3.8                      | 3.0–4.9        | 3.9                      | 3.1–4.7        | 3.9                      | 3.1–4.9        | 0.141    | -0.08  | 0.102   | -0.04     | 0.362   |
| Copper (µg/1000 kcal)      | 54.9                     | 45.2–66.3     | 48.6                     | 39.5–59.9      | 48.9                     | 40.1–59.6      | 47.3                     | 40.0–60.6      | <0.001   | -0.19  | <0.001  | -0.13     | 0.008   |

n, individuals number. 50p, median. IQR, interquartile range (25<sup>th</sup> percentile to 75<sup>th</sup> percentile). β, regression coefficient. SFA, saturated fatty acids. PUFA, polyunsaturated fatty acids.

n = 740.

\* Energy-adjusted and attenuated nutrients.

† Kruskal-Wallis test.

‡ Linear regression. Adjusted Model by variables with p < 0.2 in the binary analyzes (according S2 Table).

§ Calculated for the solid fraction of the diet, corresponding to the sum of calories from solid foods divided by the quantity in grams of these foods [50].

<https://doi.org/10.1371/journal.pone.0240756.t006>



Table 7. Diet's nutritional profile according to the caloric contribution of the consumption of ultra-processed foods by Brazilian farmers.

| Nutrients*                 | 1 <sup>st</sup> quartile |               | 2 <sup>nd</sup> quartile |                | 3 <sup>rd</sup> quartile |                | 4 <sup>th</sup> quartile |                | p-value† | Crude‡ |         | Adjusted‡ |         |
|----------------------------|--------------------------|---------------|--------------------------|----------------|--------------------------|----------------|--------------------------|----------------|----------|--------|---------|-----------|---------|
|                            | 50p                      | IQR           | 50p                      | IQR            | 50p                      | IQR            | 50p                      | IQR            |          | β      | p-value | β         | p-value |
| Calorie (kcal)             | 1923.7                   | 1693.3–2279.5 | 2013.6                   | 1644.9–2424.5  | 2078.2                   | 1772.7–2447.9  | 2170.2                   | 1908.0–2482.2  | <0.001   | 0.21   | <0.001  | 0.17      | <0.001  |
| Kilojoules (kJ)            | 8048.9                   | 7084.7–9537.3 | 8424.9                   | 6882.2–10143.9 | 8695.2                   | 7417.0–10242.1 | 9080.0                   | 7983.2–10385.5 |          |        |         |           |         |
| Energy density (kcal/g)§   | 1.9                      | 1.6–2.2       | 1.9                      | 1.6–2.2        | 1.9                      | 1.6–2.1        | 1.9                      | 1.8–2.1        | 0.290    | 0.08   | 0.137   | 0.08      | 0.154   |
| Carbohydrate (%)           | 54.1                     | 45.4–62.1     | 51.0                     | 42.4–63.2      | 50.7                     | 39.7–59.6      | 48.6                     | 42.6–56.4      | 0.007    | -0.15  | 0.004   | -0.11     | 0.038   |
| Protein (%)                | 16.9                     | 13.8–21.6     | 16.8                     | 13.8–20.7      | 16.1                     | 13.2–19.6      | 14.4                     | 12.4–17.1      | <0.001   | -0.29  | <0.001  | -0.26     | <0.001  |
| Lipid (%)                  | 33.9                     | 28.5–40.7     | 32.7                     | 28.9–39.9      | 31.0                     | 27.1–37.9      | 30.0                     | 26.1–35.3      | <0.001   | -0.20  | <0.001  | -0.17     | 0.001   |
| SFA (%)                    | 8.5                      | 6.8–10.4      | 8.4                      | 7.1–9.8        | 7.8                      | 6.4–9.8        | 7.7                      | 6.5–8.9        | 0.004    | -0.17  | 0.001   | -0.14     | 0.008   |
| PUFA (%)                   | 9.0                      | 7.4–11.0      | 9.0                      | 7.2–10.5       | 8.0                      | 6.6–9.9        | 7.1                      | 5.9–9.1        | <0.001   | -0.32  | <0.001  | -0.31     | <0.001  |
| Cholesterol (mg/1000 kcal) | 127.8                    | 105.9–163.2   | 124.9                    | 102.0–158.0    | 113.2                    | 93.5–142.9     | 109.4                    | 88.9–133.7     | <0.001   | -0.29  | <0.001  | -0.25     | <0.001  |
| Fibers (g/1000 kcal)       | 12.5                     | 10.1–16.0     | 11.7                     | 9.0–14.8       | 11.1                     | 8.8–14.2       | 9.6                      | 7.4–12.1       | <0.001   | -0.37  | <0.001  | -0.35     | <0.001  |
| Vitamin A (μg/1000 kcal)   | 255.6                    | 187.8–344.7   | 233.6                    | 177.7–327.9    | 210.9                    | 166.7–271.6    | 211.9                    | 158.3–257.5    | <0.001   | -0.21  | <0.001  | -0.16     | 0.002   |
| Vitamin B1 (mg/1000 kcal)  | 1.0                      | 0.8–1.3       | 1.0                      | 0.8–1.3        | 0.9                      | 0.7–1.1        | 0.8                      | 0.7–1.0        | <0.001   | -0.34  | <0.001  | -0.33     | <0.001  |
| Vitamin B2 (mg/1000 kcal)  | 0.6                      | 0.5–0.7       | 0.5                      | 0.4–0.7        | 0.5                      | 0.4–0.6        | 0.5                      | 0.4–0.6        | <0.001   | -0.23  | <0.001  | -0.20     | <0.001  |
| Vitamin B3 (mg/1000 kcal)  | 10.5                     | 8.3–13.3      | 10.3                     | 8.1–12.6       | 9.2                      | 7.1–11.5       | 8.4                      | 7.0–10.0       | <0.001   | -0.32  | <0.001  | -0.29     | <0.001  |
| Vitamin B6 (mg/1000 kcal)  | 0.7                      | 0.6–0.9       | 0.7                      | 0.5–0.8        | 0.6                      | 0.5–0.7        | 0.6                      | 0.5–0.7        | <0.001   | -0.37  | <0.001  | -0.34     | <0.001  |
| Vitamin B9 (μg/1000 kcal)  | 106.0                    | 82.6–141.7    | 98.7                     | 72.6–130.1     | 96.7                     | 71.0–128.0     | 76.6                     | 59.2–102.0     | <0.001   | -0.31  | <0.001  | -0.29     | <0.001  |
| Vitamin C (mg/1000 kcal)   | 49.1                     | 31.0–67.2     | 47.4                     | 32.7–69.7      | 47.3                     | 29.9–69.0      | 39.8                     | 28.6–56.5      | 0.007    | -0.18  | 0.001   | -0.19     | 0.001   |
| Vitamin E (mg/1000 kcal)   | 13.3                     | 10.8–16.7     | 12.6                     | 10.1–15.9      | 11.5                     | 8.6–14.9       | 10.1                     | 8.1–13.7       | <0.001   | -0.32  | <0.001  | -0.32     | <0.001  |
| Calcium (mg/1000 kcal)     | 168.0                    | 135.1–213.0   | 155.3                    | 129.8–207.4    | 152.9                    | 121.1–200.5    | 140.4                    | 112.3–175.1    | <0.001   | -0.20  | <0.001  | -0.17     | 0.001   |
| Iron (mg/1000 kcal)        | 7.6                      | 6.1–9.2       | 6.7                      | 5.4–8.9        | 6.7                      | 5.3–8.2        | 5.7                      | 4.7–7.3        | <0.001   | -0.20  | <0.001  | -0.16     | 0.004   |
| Phosphorus (mg/1000 kcal)  | 506.0                    | 418.0–632.5   | 488.9                    | 392.2–602.5    | 463.5                    | 382.6–557.9    | 411.5                    | 335.2–502.8    | <0.001   | -0.34  | <0.001  | -0.30     | <0.001  |
| Potassium (mg/1000 kcal)   | 1321.4                   | 1110.2–1605.0 | 1260.4                   | 1022.4–1510.1  | 1146.1                   | 943.7–1352.2   | 1057.6                   | 870.0–1235.7   | <0.001   | -0.41  | <0.001  | -0.35     | <0.001  |
| Sodium (mg/1000 kcal)      | 1400.4                   | 1073.4–1849.7 | 1378.8                   | 1067.4–1791.9  | 1226.3                   | 874.0–1551.2   | 1141.5                   | 909.1–1492.0   | <0.001   | -0.22  | <0.001  | -0.21     | <0.001  |
| Selenium (μg/1000 kcal)    | 42.3                     | 33.7–54.0     | 43.6                     | 32.4–54.3      | 37.9                     | 29.6–45.9      | 34.1                     | 28.1–41.8      | <0.001   | -0.30  | <0.001  | -0.27     | <0.001  |
| Zinc (mg/1000 kcal)        | 4.2                      | 3.4–4.9       | 4.2                      | 3.2–5.2        | 3.9                      | 3.1–5.1        | 3.6                      | 2.9–4.4        | <0.001   | -0.20  | <0.001  | -0.17     | 0.001   |
| Copper (μg/1000 kcal)      | 56.7                     | 46.8–66.8     | 52.7                     | 41.8–65.1      | 48.5                     | 38.7–57.8      | 44.0                     | 38.5–53.0      | <0.001   | -0.39  | <0.001  | -0.34     | <0.001  |

n, individuals number. 50p, median. IQR, interquartile range (25<sup>th</sup> percentile to 75<sup>th</sup> percentile). β, regression coefficient. SFA, saturated fatty acids. PUFA, polyunsaturated fatty acids.

n = 740.

\* Energy-adjusted and attenuated nutrients.

† Kruskal-Wallis test.

‡ Linear regression. Adjusted Model by variables with p < 0.2 in the binary analyzes (according S2 Table).

§ Calculated for the solid fraction of the diet, corresponding to the sum of calories from solid foods divided by the quantity in grams of these foods [50].

<https://doi.org/10.1371/journal.pone.0240756.t007>

processed, which had a higher nutritional content and less caloric intake, and the ultra-processed, which had a lower content of all macro and micronutrients analyzed as well as higher caloric content. These data demonstrate that the nutritional quality of food groups in this rural population is similar to that identified in other studies, in which ultra-processed foods have high energy density [16, 18–22, 25, 26, 29], micronutrient imbalance [15–17, 19, 20, 23–25, 28, 29], high content in sugar, saturated fat and trans fat and low in fiber [15–20, 22, 23, 25, 27–29].

In the Brazilian diet, ultra-processed foods showed 2.5 times more energy per gram, 2.0 times more free sugar, 1.5 times more fat in general and saturated fat and 8.0 times more trans fat, besides to having lower levels of fiber (3.0 times less), protein (2.0 times less) and potassium (2.5 times less) [23]. In addition, the increased participation of ultra-processed foods in the diet is inversely associated with the content of vitamins B3, B6, B12, D and E and copper, iron, phosphorus, magnesium, selenium and zinc [24]. The consumption of ultra-processed foods was also inversely associated with healthy pattern and directly associated with unhealthy pattern in the Brazilian diet [15].

When assessing the nutritional contents of the other food groups, we founded that nutritional quality due to the nutrient profile resulting from processed foods was similar to ultra-processed foods. The group of processed culinary ingredients had a higher content of carbohydrates and lipids and some nutrients, mainly due to the characteristics of the food items that make up this group, basically sources of fats and sugars. Processed culinary ingredients and minimally processed foods are directly related, since they are used in the kitchens to season and compose culinary preparations with them [48]. In this way, it is important to discuss that food processing, in itself, is not the problem, but rather the nature, extent and purpose of processing and the proportion of these food supplies in the human diet and their influence on world food patterns [49]. Food processing started as an adaptive procedure, developed in several ways to ensure edibility, palatability, microbiological safety of food and even increase the bioavailability of some nutrients [57, 58]. Diets restricted to unprocessed foods would be less diverse and even less safe, as foods become more available when processed by various harmless preservation methods [49]. Traditional cuisines established around the world are based on dishes and meals prepared with unprocessed and minimally processed foods, along with culinary ingredients and processed foods. It is concerned, then, with the large isocaloric exchange of the first three food groups for the ultra-processed group, and with the stages of ultra-processing of food, which leads to the addition of sugar, starch, sodium and hydrogenated and saturated fat [49, 57, 59].

This may also have reflected in the adequacy of nutrients to the fraction of the diet composed of each NOVA food group, which appeared to be better in the group of minimally processed foods and processed culinary ingredients. Furthermore, a low percentage of individuals was observed who met the current nutritional recommendations for many nutrients, such as calcium, potassium, sodium, zinc, vitamins A, B9 and C and fibers. This is in line with the data in the literature, in which there is a high prevalence of inadequacy in the intake of calcium, sodium, magnesium and vitamins A, C, D and E in Brazil, with this inadequacy being, in general, higher in the rural than in urban area [60].

It was also identified in this study that the caloric contribution of the diet from ultra-processed foods was slightly lower than the national average (17.7% versus 20.4%) [15]. This small difference is in accordance with the changes in the consumption profile in rural areas [33, 35–39], due to the low access to healthy food caused by its high cost [42], difficult access [41, 43], low education to provide healthy food choices [41], the understanding of foods produced only as merchandises [3], and the influences of rural labor structures [41].

In 2002–2003, the consumption of ultra-processed foods represented 20.0% of the caloric consumption of food in Brazil [8], increasing the share of ready-to-eat foods between 2002–

2003 and 2008–2009 [14]. POF data 2008–2009 indicated that the average daily energy consumption of Brazilians was 1,866 kcal [15, 23], with 58.1% of unprocessed or minimally processed food, 10.9% of processed culinary ingredients, 10.6% of processed food and 20.4% of ultra-processed foods [15], a distribution similar to that found in the present study.

It is important to point out that the developed western countries present a greater caloric contribution coming from ultra-processed foods, as can be seen in the United States of America (60.0%) [11], United Kingdom (54.3%) [12] e Canada (45.0%) [13]. However, in developing countries this percentage is lower, as identified in Mexico (29.8%) [61], Chile (28.6%) [18] and here in Brazil (20.4%) [15].

A country that stands out for presenting a lower percentage of caloric contribution of this food group, even though it is a developed country, is France (35.9%) [17]. Such fact may be due to the presence of the traditional local food culture, which encourages home cooking, family meals and consumption of handmade products, proceeding as a protective factor for the high consumption of ultra-processed foods [17, 62].

A similar fact may occur in this study in rural areas, since many foods typical of Brazilian culture and local European colonization are maintained in this population [63]. This fact can be reinforced by the greater caloric contribution from minimally processed foods with processed culinary ingredients, producing especially culinary preparations such as breads, cakes, cookies, sweets and other homemade products. The rural area also shows higher adherence to traditional Brazilian food, with a higher consumption of beans and other legumes, rice, corn, cassava and yams [64], but also bread, leafy, milk, animal fat, margarine, sugar, cassava flour and coffee [65].

In addition, another fact that may contribute to the lower consumption of ultra-processed foods in this region is that the average price of *in natura* and minimally processed foods in Brazil (R\$ 2.28/1000 kcal) is lower than the average price of ultra-processed foods (R\$ 2.40/1000 kcal) [66]. However, a recent study identified that since the beginning of the 2000s the price of ultra-processed foods has undergone successive reductions in Brazil, becoming cheaper than processed foods, and it is predicted that unhealthy foods will become cheaper than healthy ones in 2026 [67]. As expected, the lowest caloric contribution of the farmers' diet provided by the group of processed food, as in Brazil (10.6%) [15]. Moreover, the consumption of minimally processed foods in this population was higher than the national one (64.7% versus 58.1%) [15] despite the low consumption of fruits and vegetables in rural regions [37, 38, 68].

When evaluating possible differences between the sexes, no relevant discrepancies were found in the caloric contribution of food groups and their food items. However, Bielemann et al. [25], in another Brazilian region, observed that the consumption of ultra-processed by women was slightly higher than in men. Nardocci et al. [13] found the opposite in the Canadian population, whose consumption of these foods was higher among young men.

Analizing the food groups, we found that consumption tends to be higher in males, with the exception of some foods such as fruits, milk, vegetables, bakery products and candies, which was higher in females. This is conforming to literature, since women adhere less to a traditional Brazilian food pattern [69], consuming these foods in their small meals, and eating more of fruits and vegetables in Brazil [70].

Regarding the possible limitations of the study, we can mention that the multiple R24h to collect food data may present bias in the interviewee's memory or difficulty in measuring the amount actually consumed, even with the help of photo albums of portions and utensils. Additionally, other micronutrients or phytochemicals can compose the variables that evaluate the nutritional profile of these food groups, however, only the nutrients presented in this study had their information available. Also, some nutrients such as sodium are not well estimated by

food recall methods, and their interpretations are limited in this study. In the same way, the quantities of the processed culinary ingredients can be inaccurate, given the difficulty of accurately measuring the quantity of these items added to meals throughout the day. In addition, the micronutrient content in some typical foods in the region may have been underestimated, due to the lack of complete nutritional information on the recipes or the unavailability of all nutrients in the food composition table. Still, some culinary preparations that could not be disaggregated may have increased the percentage of caloric contribution from minimally processed foods.

Despite these possible biases, which are intrinsic to the methodology of analyzing food consumption in population studies, the evaluation of food consumption according to the degree and purpose of processing makes it possible to differentiate the quality of food, previously only grouped by its nutrient profile, in addition to assessing different characteristics intrinsic to eating behavior [8]. As well, to standardize their classification allows data comparison and monitoring of dietary changes over time [57, 71]. Besides, this method with multiple replications of R24h is a strong point of the study, since it allowed us to accurately evaluate the food items in a rural area.

Therefore, in this study it was identified that the group of foods with the greatest caloric contribution in the diet of these farmers was that of minimally processed foods, followed by ultra-processed foods, processed culinary ingredients, and processed foods. The caloric contribution from the consumption of ultra-processed foods is still slightly lower than the national average. However, measures aimed at delaying isocaloric exchanges between food groups must be carried out in order to maintain the local food culture, since ultra-processed foods showed worse nutritional levels. Furthermore, changes in eating habits in this rural region must be encouraged in order to increase the consumption of minimally processed foods, because it is precisely the group of foods that presented the best nutritional levels, especially of micronutrients in the diet.

## Supporting information

**S1 Table. Current recommendations of consumption of nutrients.** SFA, saturated fatty acids. PUFA, polyunsaturated fatty acids. WCRF & AICR, World Cancer Research Fund & American Institute for Cancer Research. WHO, World Health Organization. FNB, Food and Nutrition Board. \* Calculated for the solid fraction of the diet, corresponding to the sum of calories from solid foods divided by the quantity in grams of these foods [39].  
(DOCX)

**S2 Table. Factors associated with food intake of nutrients for the selection of adjustment variables.** *P*, p-value. *n* = 740. Mann-Whitney U test. \* Kruskal-Wallis test. Values presented in median.  
(DOCX)

## Author Contributions

**Conceptualization:** Monica Cattafesta, Glenda Blaser Petarli, Eliana Zandonade, Olívia Maria de Paula Alves Bezerra, Luciane Bresciani Salaroli.

**Data curation:** Monica Cattafesta, Glenda Blaser Petarli, Eliana Zandonade, Olívia Maria de Paula Alves Bezerra, Luciane Bresciani Salaroli.

**Formal analysis:** Monica Cattafesta, Glenda Blaser Petarli, Eliana Zandonade, Olívia Maria de Paula Alves Bezerra, Sandra Marlene Ribeiro de Abreu, Luciane Bresciani Salaroli.

**Funding acquisition:** Monica Cattafesta, Glenda Blaser Petarli, Eliana Zandonade, Olívia Maria de Paula Alves Bezerra, Luciane Bresciani Salaroli.

**Investigation:** Monica Cattafesta, Glenda Blaser Petarli, Eliana Zandonade, Olívia Maria de Paula Alves Bezerra, Sandra Marlene Ribeiro de Abreu, Luciane Bresciani Salaroli.

**Methodology:** Monica Cattafesta, Glenda Blaser Petarli, Eliana Zandonade, Olívia Maria de Paula Alves Bezerra, Sandra Marlene Ribeiro de Abreu, Luciane Bresciani Salaroli.

**Project administration:** Monica Cattafesta, Glenda Blaser Petarli, Eliana Zandonade, Olívia Maria de Paula Alves Bezerra, Luciane Bresciani Salaroli.

**Resources:** Monica Cattafesta, Glenda Blaser Petarli, Eliana Zandonade, Olívia Maria de Paula Alves Bezerra, Sandra Marlene Ribeiro de Abreu, Luciane Bresciani Salaroli.

**Supervision:** Eliana Zandonade, Olívia Maria de Paula Alves Bezerra, Sandra Marlene Ribeiro de Abreu, Luciane Bresciani Salaroli.

**Validation:** Monica Cattafesta, Glenda Blaser Petarli, Eliana Zandonade, Olívia Maria de Paula Alves Bezerra, Sandra Marlene Ribeiro de Abreu, Luciane Bresciani Salaroli.

**Visualization:** Monica Cattafesta, Glenda Blaser Petarli, Eliana Zandonade, Olívia Maria de Paula Alves Bezerra, Sandra Marlene Ribeiro de Abreu, Luciane Bresciani Salaroli.

**Writing – original draft:** Monica Cattafesta, Glenda Blaser Petarli, Eliana Zandonade, Olívia Maria de Paula Alves Bezerra, Sandra Marlene Ribeiro de Abreu, Luciane Bresciani Salaroli.

**Writing – review & editing:** Monica Cattafesta, Glenda Blaser Petarli, Eliana Zandonade, Olívia Maria de Paula Alves Bezerra, Sandra Marlene Ribeiro de Abreu, Luciane Bresciani Salaroli.

## References

1. Fanzo J. The role of farming and rural development as central to our diets. *Physiol Behav.* 2018; 193: 291–297. <https://doi.org/10.1016/j.physbeh.2018.05.014> PMID: 29772207
2. Santos AB da S, Veloso SL, Oliveira HA de. A modernização da agricultura e os impactos ambientais da primeira revolução agrícola dos tempos modernos até os dias atuais. *Anais SNCMA.* 2017; 8: 1–9.
3. Triches RM, Schneider S. Alimentação, sistema agroalimentar e os consumidores: novas conexões para o desenvolvimento rural. *Cuad Desarro Rural.* 2015; 12: 55–75. <https://doi.org/10.11144/Javeriana.cdr12-75.asac>
4. Esteve EV. O negócio da comida: quem controla nossa alimentação? São Paulo: Expressão popular; 2017.
5. Dadalto GG, Silva AES da, Costa EB da, Galvêas PAO, Loss WR. Transformações da agricultura capixaba: 50 anos. Vitória: Cedagro; Incaper; Seag; 2016. Available: [http://www.cedagro.org.br/arquivos/Livro\\_Agric\\_Capixaba\\_50anos\\_set16.pdf](http://www.cedagro.org.br/arquivos/Livro_Agric_Capixaba_50anos_set16.pdf)
6. Fernandez-Armesto F. Comida: uma história. 1st ed. Rio de Janeiro: Record; 2004.
7. Poulain J-P. Sociologias da alimentação: os comedores e o espaço social alimentar. 2nd ed. Florianópolis: UFSC; 2013.
8. Monteiro CA, Levy RB, Claro RM, Castro IRR de, Cannon G. A new classification of foods based on the extent and purpose of their processing. *Cad Saúde Pública.* 2010; 26: 2039–2049. <https://doi.org/10.1590/s0102-311x2010001100005> PMID: 21180977
9. Brasil. Guia alimentar para a população brasileira. 2nd ed. Brasília: Ministério da Saúde. Secretaria de Atenção à Saúde. Secretaria de Atenção à Saúde; 2014.
10. Monteiro CA, Moubarac J-C, Cannon G, Ng SW, Popkin B. Ultra-processed products are becoming dominant in the global food system: Ultra-processed products: global dominance. *Obes Rev.* 2013; 14: 21–28. <https://doi.org/10.1111/obr.12107> PMID: 24102801
11. Baraldi LG, Martinez Steele E, Canella DS, Monteiro CA. Consumption of ultra-processed foods and associated sociodemographic factors in the USA between 2007 and 2012: evidence from a nationally

- representative cross-sectional study. *BMJ Open*. 2018; 8: e020574. <https://doi.org/10.1136/bmjopen-2017-020574> PMID: 29525772
12. Rauber F, Steele EM, Louzada ML da C, Millett C, Monteiro CA, Levy RB. Ultra-processed food consumption and indicators of obesity in the United Kingdom population (2008–2016). Meyre D, editor. *PLOS ONE*. 2020; 15: e0232676. <https://doi.org/10.1371/journal.pone.0232676> PMID: 32357191
  13. Nardocci M, Leclerc B-S, Louzada M-L, Monteiro CA, Batal M, Moubarac J-C. Consumption of ultra-processed foods and obesity in Canada. *Can J Public Health*. 2019; 110: 4–14. <https://doi.org/10.17269/s41997-018-0130-x> PMID: 30238324
  14. Martins APB, Levy RB, Claro RM, Moubarac JC, Monteiro CA. Participacao crescente de produtos ultraprocessados na dieta brasileira (1987–2009). *Rev Saude Pública*. 2013; 47: 656–665. <https://doi.org/10.1590/S0034-8910.2013047004968> PMID: 24346675
  15. Louzada ML da C, Ricardo CZ, Steele EM, Levy RB, Cannon G, Monteiro CA. The share of ultra-processed foods determines the overall nutritional quality of diets in Brazil. *Public Health Nutr*. 2018; 21: 94–102. <https://doi.org/10.1017/S1368980017001434> PMID: 28714425
  16. Rauber F, da Costa Louzada ML, Steele E, Millett C, Monteiro CA, Levy RB. Ultra-Processed Food Consumption and Chronic Non-Communicable Diseases-Related Dietary Nutrient Profile in the UK (2008–2014). *Nutrients*. 2018; 10: 587. <https://doi.org/10.3390/nu10050587> PMID: 29747447
  17. Julia C, Martinez L, Allès B, Touvier M, Hercberg S, Méjean C, et al. Contribution of ultra-processed foods in the diet of adults from the French NutriNet-Santé study. *Public Health Nutr*. 2018; 21: 27–37. <https://doi.org/10.1017/S1368980017001367> PMID: 28703085
  18. Cediel G, Reyes M, da Costa Louzada ML, Martinez Steele E, Monteiro CA, Corvalán C, et al. Ultra-processed foods and added sugars in the Chilean diet (2010). *Public Health Nutr*. 2018; 21: 125–133. <https://doi.org/10.1017/S1368980017001161> PMID: 28625223
  19. Monteiro CA, Cannon G, Levy RB, Claro R, Moubarac J-C. The big issue for nutrition, disease, health, well-being. *World Nutr*. 2012; 3: 527–569.
  20. Moubarac J-C, Martins APB, Claro RM, Levy RB, Cannon G, Monteiro CA. Consumption of ultra-processed foods and likely impact on human health. Evidence from Canada. *Public Health Nutr*. 2013; 16: 2240–2248. <https://doi.org/10.1017/S1368980012005009> PMID: 23171687
  21. Canella DS, Levy RB, Martins APB, Claro RM, Moubarac J-C, Baraldi LG, et al. Ultra-Processed Food Products and Obesity in Brazilian Households (2008–2009). Votruba SB, editor. *PLoS ONE*. 2014; 9: e92752. <https://doi.org/10.1371/journal.pone.0092752> PMID: 24667658
  22. Crovetto M M, Uauy R, Martins AP, Moubarac JC. Disponibilidad de productos alimentarios listos para el consumo en los hogares de Chile y su impacto sobre la calidad de la dieta (2006–2007). *Rev Médica Chile*. 2014; 142: 850–858. <https://doi.org/10.4067/S0034-98872014000700005> PMID: 25378004
  23. Louzada ML da C, Martins APB, Canella DS, Baraldi LG, Levy RB, Claro RM, et al. Ultra-processed foods and the nutritional dietary profile in Brazil. *Rev Saude Pública*. 2015; 49: 38. <https://doi.org/10.1590/S0034-8910.2015049006132> PMID: 26176747
  24. Louzada ML da C, Martins APB, Canella DS, Baraldi LG, Levy RB, Claro RM, et al. Impact of ultra-processed foods on micronutrient content in the Brazilian diet. *Rev Saude Pública*. 2015; 49: 45. <https://doi.org/10.1590/S0034-8910.2015049006211> PMID: 26270019
  25. Bielemann RM, Motta JVS, Minten GC, Horta BL, Gigante DP. Consumption of ultra-processed foods and their impact on the diet of young adults. *Rev Saude Pública*. 2015; 49: 28. <https://doi.org/10.1590/s0034-8910.2015049005572> PMID: 26018785
  26. Poti JM, Mendez MA, Ng SW, Popkin BM. Is the degree of food processing and convenience linked with the nutritional quality of foods purchased by US households? *Am J Clin Nutr*. 2015; 101: 1251–1262. <https://doi.org/10.3945/ajcn.114.100925> PMID: 25948666
  27. Martínez Steele E, Baraldi LG, Louzada ML da C, Moubarac J-C, Mozaffarian D, Monteiro CA. Ultra-processed foods and added sugars in the US diet: evidence from a nationally representative cross-sectional study. *BMJ Open*. 2016; 6: e009892. <https://doi.org/10.1136/bmjopen-2015-009892> PMID: 26962035
  28. Martínez Steele E, Raubenheimer D, Simpson SJ, Baraldi LG, Monteiro CA. Ultra-processed foods, protein leverage and energy intake in the USA. *Public Health Nutr*. 2018; 21: 114–124. <https://doi.org/10.1017/S1368980017001574> PMID: 29032787
  29. Moubarac J-C, Batal M, Louzada ML, Martinez Steele E, Monteiro CA. Consumption of ultra-processed foods predicts diet quality in Canada. *Appetite*. 2017; 108: 512–520. <https://doi.org/10.1016/j.appet.2016.11.006> PMID: 27825941
  30. Canella DS, Louzada MLDC, Claro RM, Costa JC, Bandoni DH, Levy RB, et al. Consumo de hortaliças e sua relação com os alimentos ultraprocessados no Brasil. *Rev Saude Pública*. 2018; 52: 50. <https://doi.org/10.11606/s1518-8787.2018052000111> PMID: 29791530



31. Luz TC da, Cattafesta M, Petarli GB, Meneghetti JP, Zandonade E, Bezerra OM de PA, et al. Cardiovascular risk factors in a Brazilian rural population. *Ciênc Saúde Coletiva*. 2020; 25: 3921–3932. <https://doi.org/10.1590/1413-812320202510.36022018> PMID: 32997024
32. Petarli GB, Cattafesta M, Sant'Anna MM, Bezerra OM de PA, Zandonade E, Salaroli LB. Multimorbidity and complex multimorbidity in Brazilian rural workers. Cheong SA, editor. *PLOS ONE*. 2019; 14: e0225416. <https://doi.org/10.1371/journal.pone.0225416> PMID: 31743369
33. Cattafesta M, Petarli GB, da Luz TC, Zandonade E, de Paula Alves Bezerra OM, Salaroli LB. Dietary patterns of Brazilian farmers and their relation with sociodemographic, labor, and lifestyle conditions. *Nutr J*. 2020; 19: 23. <https://doi.org/10.1186/s12937-020-00542-y> PMID: 32209090
34. Brumby S, Kennedy A, Chandrasekara A. Alcohol Consumption, Obesity, and Psychological Distress in Farming Communities—An Australian Study: Alcohol and Health in Australian Farmers. *J Rural Health*. 2013; 29: 311–319. <https://doi.org/10.1111/jrh.12001> PMID: 23802933
35. Fernandes MP, Bielemann RM, Fassa AG. Factors associated with the quality of the diet of residents of a rural area in Southern Brazil. *Rev Saúde Pública*. 2018; 52: 6s. <https://doi.org/10.11606/S1518-8787.2018052000267> PMID: 30234881
36. Reinaldo EDF, Silva MRF da, Nardoto GB, Garavello ME de PE. Mudanças de hábitos alimentares em comunidades rurais do semiárido da Região Nordeste do Brasil. *Interiencia*. 2015; 40: 8.
37. Rodrigues LPF, Carvalho RC, Maciel A, Otanasio PN, Garavello ME de PE, Nardoto GB. Food Insecurity in Urban and Rural Areas in Central Brazil: Transition from Locally Produced Foods to Processed Items. *Ecol Food Nutr*. 2016; 55: 365–377. <https://doi.org/10.1080/03670244.2016.1188090> PMID: 27286412
38. Tripathy JP, Thakur JS, Jeet G, Chawla S, Jain S, Prasad R. Urban rural differences in diet, physical activity and obesity in India: are we witnessing the great Indian equalisation? Results from a cross-sectional STEPS survey. *BMC Public Health*. 2016; 16: 816. <https://doi.org/10.1186/s12889-016-3489-8> PMID: 27538686
39. Zeng Q, Zeng Y. Eating out and getting fat? A comparative study between urban and rural China. *Appetite*. 2018; 120: 409–415. <https://doi.org/10.1016/j.appet.2017.09.027> PMID: 28964905
40. Dutko P, Ver Ploeg M, Farrigan T. Characteristics and Influential Factors of Food Deserts. ERR-140, U.S. Department of Agriculture, Economic Research Service; 2012. Available: [https://www.ers.usda.gov/webdocs/publications/45014/30940\\_err140.pdf](https://www.ers.usda.gov/webdocs/publications/45014/30940_err140.pdf)
41. Lenardson JD, Hansen AY, Hartley D. Rural and Remote Food Environments and Obesity. *Curr Obes Rep*. 2015; 4: 46–53. <https://doi.org/10.1007/s13679-014-0136-5> PMID: 26627089
42. Centers for Disease Control and Prevention (CDC). Food Deserts. In: Atlanta: Center for Disease Control and Prevention [Internet]. 2010 [cited 17 May 2017]. Available: <http://www.cdc.gov/Features/FoodDeserts/>
43. Lucan SC, Gustafson A, Jilcott Pitts SB. The Concept of “Rural Food Deserts” Is Still Meaningful. *Child Obes*. 2012; 8: 484–485. <https://doi.org/10.1089/chi.2012.0063> PMID: 23061503
44. Salaroli LB, Petarli GB, Cattafesta M, Luz TC da, Figueiredo RTN e S, Zandonade E, et al. Fatores de risco para doenças crônicas em agricultores de Santa Maria de Jetibá, Espírito Santo. Experiências exitosas em vigilância em saúde de populações expostas a agrotóxicos no Brasil: relatório nacional. Brasília: Ministério da Saúde. Secretaria de Vigilância em Saúde. Departamento de Saúde Ambiental, do Trabalhador e Vigilância das Emergências em Saúde Pública.; 2019. pp. 32–59. Available: [http://bvsmms.saude.gov.br/bvs/publicacoes/agrotoxicos\\_otica\\_sistema\\_unico\\_saude\\_v2.pdf](http://bvsmms.saude.gov.br/bvs/publicacoes/agrotoxicos_otica_sistema_unico_saude_v2.pdf)
45. Núcleo de Estudos e Pesquisas em Alimentação (NEPA), Universidade Estadual de Campinas (UNICAMP). Tabela Brasileira de Composição de Alimentos (TACO). 4th ed. Campinas: NEPA; UNICAMP; 2011.
46. Willett W. *Nutritional Epidemiology*. New York: Oxford University Press; 2013.
47. Nusser SM, Carriquiry AL, Fuller WA. A semi parametric transformation approach to estimating usual intake distributions. *J Am Stat Assoc*. 1996; 91: 1440–1449.
48. Monteiro CA, Cannon G, Levy R, Moubarac J-C, Martins AP, Canella D, et al. Classificação dos alimentos. *Saúde Pública. NOVA. A estrela brilha. World Nutr*. 2016; 7: 28–40.
49. Monteiro CA, Cannon G, Levy RB, Moubarac J-C, Louzada ML, Rauber F, et al. Ultra-processed foods: what they are and how to identify them. *Public Health Nutr*. 2019; 22: 936–941. <https://doi.org/10.1017/S1368980018003762> PMID: 30744710
50. World Cancer Research Fund (WCRF), American Institute for Cancer Research (AICR). Overview of the second expert Report. Food, Nutrition, Physical Activity, and the Prevention of Cancer: a Global Perspective. Washington: AICR; 2007. pp. 6–14.
51. World Health Organization (WHO). Diet, nutrition, and the prevention of chronic diseases. Genève: WHO; 2003.

52. World Health Organization (WHO). Healthy diet. 2018 [cited 22 Jul 2019]. Available: <http://www.who.int/mediacentre/factsheets/fs394/en/>
53. Food and Nutrition Board (FNB), Health and Medicine Division (HMD). Dietary Reference Intakes Tables and Application. 2011 1991 [cited 22 Jul 2019]. Available: <http://nationalacademies.org/hmd/Activities/Nutrition/SummaryDRIs/DRI-Tables.aspx>
54. Associação Brasileira de Empresas de Pesquisa (ABEP). Critério de Classificação Econômica Brasil (CCEB). ABEP; 2014. Available: <http://www.abep.org/criterio-brasil>
55. Instituto Brasileiro de Geografia e Estatística. Censo agropecuário 2006. 2006. Available: [https://biblioteca.ibge.gov.br/visualizacao/periodicos/51/agro\\_2006.pdf](https://biblioteca.ibge.gov.br/visualizacao/periodicos/51/agro_2006.pdf)
56. Sichieri R, Souza RA de. Estratégias para prevenção da obesidade em crianças e adolescentes. *Cad Saúde Pública*. 2008; 24: 209–223. <https://doi.org/10.1590/S0102-311X2008001400002> PMID: [18670698](https://pubmed.ncbi.nlm.nih.gov/18670698/)
57. Food and Agriculture Organization (FAO). Guidelines on the collection of information on food processing through food consumption surveys. Food and Agriculture Organization of the United Nations Rome.: 44.
58. International Network of Food Data Systems (INFOODS). International food composition table/database directory. 2015 [cited 1 Mar 2019]. Available: <http://www.fao.org/infoods/infoods/tables-and-databases/en/>
59. Botelho R, Araújo W, Pineli L. Food formulation and not processing level: Conceptual divergences between public health and food science and technology sectors. *Crit Rev Food Sci Nutr*. 2018; 58: 639–650. <https://doi.org/10.1080/10408398.2016.1209159> PMID: [27439065](https://pubmed.ncbi.nlm.nih.gov/27439065/)
60. Araujo MC, Bezerra, Barbosa F dos S, Jungerl WL, Yokoo EM, Pereira RA, et al. Consumo de macronutrientes e ingestão inadequada de micronutrientes em adultos. *Rev Saúde Pública*. 2013; 47: 177S–89S. <https://doi.org/10.1590/s0034-89102013000700004> PMID: [23703262](https://pubmed.ncbi.nlm.nih.gov/23703262/)
61. Marrón-Ponce JA, Sánchez-Pimienta TG, Louzada ML da C, Batis C. Energy contribution of NOVA food groups and sociodemographic determinants of ultra-processed food consumption in the Mexican population. *Public Health Nutr*. 2018; 21: 87–93. <https://doi.org/10.1017/S1368980017002129> PMID: [28937354](https://pubmed.ncbi.nlm.nih.gov/28937354/)
62. United Nations Educational, Scientific and Cultural Organization (UNESCO). Convention for the Safeguarding of the Intangible Cultural Heritage. Paris: UNESCO; 2010. Available: [ITH/10/5.COM/CONF.202/6](http://www.unesco.org/culture/ich/convention)
63. Schmidt A, Farias R de CP. A comida e a sociabilidade na cultura pomerana. 2015; 3: 195–218.
64. Bezerra IN, Souza A de M, Pereira RA, Sichieri R. Consumo de alimentos fora do domicílio no Brasil. *Rev Saúde Pública*. 2013; 47: 200S–11S. <https://doi.org/10.1590/s0034-89102013000700006> PMID: [23703264](https://pubmed.ncbi.nlm.nih.gov/23703264/)
65. Carvalho EO, Rocha EF da. Consumo alimentar de população adulta residente em área rural da cidade de Ibatiba (ES, Brasil). *Ciênc Saúde Coletiva*. 2011; 16: 179–185. <https://doi.org/10.1590/S1413-81232011000100021> PMID: [21180826](https://pubmed.ncbi.nlm.nih.gov/21180826/)
66. Claro RM, Maia EG, Costa BV de L, Diniz DP. Preço dos alimentos no Brasil: prefira preparações culinárias a alimentos ultraprocessados. *Cad Saúde Pública*. 2016; 32: e00104715. <https://doi.org/10.1590/0102-311X00104715> PMID: [27580234](https://pubmed.ncbi.nlm.nih.gov/27580234/)
67. Maia EG, dos Passos CM, Levy RB, Bortoletto Martins AP, Mais LA, Claro RM. What to expect from the price of healthy and unhealthy foods over time? The case from Brazil. *Public Health Nutr*. 2020; 1–10. <https://doi.org/10.1017/S1368980019003586> PMID: [31937385](https://pubmed.ncbi.nlm.nih.gov/31937385/)
68. Dean WR, Sharkey JR. Rural and Urban Differences in the Associations between Characteristics of the Community Food Environment and Fruit and Vegetable Intake. *J Nutr Educ Behav*. 2011; 43: 426–433. <https://doi.org/10.1016/j.jneb.2010.07.001> PMID: [21616721](https://pubmed.ncbi.nlm.nih.gov/21616721/)
69. Andrade G, da Costa Louzada M, Azeredo C, Ricardo C, Martins A, Levy R. Out-of-Home Food Consumers in Brazil: What do They Eat? *Nutrients*. 2018; 10: 218. <https://doi.org/10.3390/nu10020218> PMID: [29462918](https://pubmed.ncbi.nlm.nih.gov/29462918/)
70. Jaime PC, Stopa SR, Oliveira TP, Vieira ML, Szwarcwald CL, Malta DC. Prevalência e distribuição sociodemográfica de marcadores de alimentação saudável, Pesquisa Nacional de Saúde, Brasil 2013. *Epidemiol E Serviços Saúde*. 2015; 24: 267–276. <https://doi.org/10.5123/S1679-49742015000200009>
71. Vandevijvere S, Monteiro C, Krebs-Smith SM, Lee A, Swinburn B, Kelly B, et al. Monitoring and benchmarking population diet quality globally: a step-wise approach: Monitoring population diet quality. *Obes Rev*. 2013; 14: 135–149. <https://doi.org/10.1111/obr.12082> PMID: [24074217](https://pubmed.ncbi.nlm.nih.gov/24074217/)
